# Supplementary material for: Genome-wide analysis of plant miRNA action clarifies levels of regulatory dynamics across developmental contexts
Source: Genome Res. 2021 May;31(5):811–22. doi: 10.1101/gr.270918.120 (PMC8092011; doi:10.1101/gr.270918.120)
Supplement: Supplemental Material [file supp_gr.270918.120_Supplemental_Datasets.xlsx]

## Sheet: Dataset 1
Supplemental Dataset1 Expression of precursor genes and mature miRNAs in the apex
GeneID	Chr	Start	End	Strand	miRNA seq	miRNA Read count apex	Normalized miRNA read count (RPM)	Meristem (RPM)	L1 (RPM)	L2 (RPM)	Central zone (RPM)	P0 (RPM)	Internode (RPM)	P1 (RPM)	P2 (RPM)	P3 (RPM)	Vasc. (RPM)	Adaxial (RPM)	Abaxial (RPM)
zma-MIR156a	chr4	83913436	83914231	-	TGACAGAAGAGAGTGAGCAC	193	1.87405	0	0	0	0	0	0	0	0	0	0	0	0
zma-MIR156b	chr3	7774779	7775581	-	TGACAGAAGAGAGTGAGCAC			0	0	0	0	0	0	0	0	0	0	0	0
zma-MIR156c	chr3	7775751	7776159	-	TGACAGAAGAGAGTGAGCAC			0	0	0	0	0	0	0	0	0	0	0	0
zma-MIR156d	chr5	92400574	92406722	-	TGACAGAAGAGAGTGAGCAC			0.2487	2.11075	0.46315	1.6326	0.0381	0.1468	0.03935	0	0	1.2254	0.46645	0.0652
zma-MIR156e	chr2	32121339	32125477	+	TGACAGAAGAGAGTGAGCAC			0.1245	0.197	0.10005	0.12445	0	0.02745	0	0.1227	0.53075	0.61895	0	0.0652
zma-MIR156f	chr2	180842853	180843469	-	TGACAGAAGAGAGTGAGCAC			0	0	0	0	0	0	0	0.0206	0	0	0.06105	0
zma-MIR156g	chr7	115996790	116000632	+	TGACAGAAGAGAGTGAGCAC			0	0.0208	0.04	0.10695	0	0	0	0.02015	0.0396	0.19485	0.06105	0
zma-MIR156h	chr10	128548923	128550565	-	TGACAGAAGAGAGTGAGCAC			0	0	0.02075	0	0	0	0	0.0811	0	0	0	0
zma-MIR156i	chr4	137205362	137206683	-	TGACAGAAGAGAGTGAGCAC			0	0.0661	0	0	0.2072	0.02745	0.03935	0	0.39405	0	0	0
zma-MIR156l	chr5	183907003	183907966	-	TGACAGAAGAGAGTGAGCAC			0	0	0	0	0.01725	0	0	0	0	0	0	0
zma-MIR156j	chr7	130685130	130685582	-	TGACAGAAGAGAGAGAGCACA	0	0	0	0.04405	0	0.0218	0.08635	0.0549	0.10305	0.0819	0.2199	0	0.6472	0.0932
zma-MIR156k	chr6	96285251	96291334	-	TGACAGAAGAGAGCGAGCAC	11	0.106811	5.8264	12.8201	6.9288	9.22945	11.8129	2.8106	14.2094	18.3145	24.1508	57.5614	7.3588	5.82615
zma-MIR159a	chr8	10392528	10394245	+	TTTGGATTGAAGGGAGCTCTG	21160	205.465	134.441	181.203	140.255	228.148	377.57	270.752	366.839	382.842	326.68	409.89	224.141	336.417
zma-MIR159b	chr8	10588492	10589521	-	TTTGGATTGAAGGGAGCTCTG			0	0	0	0	0	0	0	0	0	0	0	0
zma-MIR159f	chr3	25491327	25492723	-	TTTGGATTGAAGGGAGCTCTG			107.374	92.227	87.4065	225.312	44.6337	64.9063	29.8459	29.8565	28.9743	50.9426	25.9499	25.1151
zma-MIR159j	chr8	10544283	10545495	+	TTTGGATTGAAGGGAGCTCTG			0	0	0	0	0	0	0	0	0	0	0	0
zma-MIR159k	chr8	10584604	10585573	+	TTTGGATTGAAGGGAGCTCTG			0	0	0	0	0	0	0	0	0	0	0	0
zma-MIR159c	chr3	2747994	2748260	-	CTTGGATTGAAGGGAGCTCCT	3	0.0291302	0	0	0	0	0	0	0	0	0	0	0.0407	0
zma-MIR159d	chr8	26827456	26828066	+	CTTGGATTGAAGGGAGCTCCT			0.04135	0.91105	0.12005	0.1452	0.0381	0	0.03935	0	0	0.0207	0	0
zma-MIR159e	chr1	246090026	246092881	+	ATTGGTTTGAAGGGAGCTCCA	0	0	0.02075	0	0.02075	0.0415	0.01725	0	0.02125	0	0	0	0	0
zma-MIR159g	chr4	25746141	25747015	+	TTTGGAGTGAAGGGAGTTCTG	0	0	0	0	0	0	0	0	0	0	0	0	0	0
zma-MIR159h	chr8	10528417	10529552	+	TTTGGAGTGAAGGGAGCTCTG	20	0.194202	0	0	0	0	0	0	0	0	0	0	0	0
zma-MIR159i	chr8	10532312	10533287	+	TTTGGAGTGAAGGGAGCTCTG			0	0	0	0	0	0	0	0	0	0	0	0
zma-MIR160a	chr4	236950954	236951931	+	TGCCTGGCTCCCTGTATGCCA	1920	18.6433	0.04135	0.28395	0.08225	0.1037	0.13335	0.03065	0.15895	0.1643	0	0.63695	0.02035	0
zma-MIR160b	chr5	43048719	43049987	+	TGCCTGGCTCCCTGTATGCCA			0	0	0	0.02075	0	0	0	0	0	0	0	0
zma-MIR160c	chr6	9147108	9149349	+	TGCCTGGCTCCCTGTATGCCA			0.1245	5.7259	1.90375	1.9543	0.82045	1.292	0.2573	0.02015	0.0396	4.61525	0.7736	0.03105
zma-MIR160d	chr1	283652080	283652981	+	TGCCTGGCTCCCTGTATGCCA			4.48585	2.32185	5.31855	0.871	7.21755	3.1515	22.853	19.7597	21.5477	15.3282	3.8061	7.5597
zma-MIR160g	chr6	91612895	91613180	+	TGCCTGGCTCCCTGTATGCCA			0	0	0	0	0	0	0	0	0	0	0	0
zma-MIR160f	chr2	237695176	237695644	-	TGCCTGGCTCCCTGTATGCCG	21	0.203912	0	0	0.02075	0	0	0	0	0	0	0	0	0
zma-MIR162	chr5	182088689	182091468	-	TCGATAAACCTCTGCATCCAG	1113	10.8073	8.4	9	8.55	5.75	6.7	6.95	4.05	5.1	9.15	6.8	4.75	3.9
zma-MIR164a	chr2	217296001	217296569	-	TGGAGAAGCAGGGCACGTGCA	161	1.56332	0.0415	0	0	0.06225	0.03455	0.03065	0	0	0	0	0	0
zma-MIR164b	chr6	141801242	141803494	+	TGGAGAAGCAGGGCACGTGCA			8.93285	34.0238	14.4625	7.57505	5.9452	6.4983	25.0078	21.7852	15.8528	14.0049	4.68115	9.4105
zma-MIR164c	chr6	153549164	153551556	-	TGGAGAAGCAGGGCACGTGCA			0	0.4225	0.02	0.06225	0.20605	0	0.47755	0.3656	0.07925	0.44345	0.1674	0
zma-MIR164d	chr7	172764222	172765040	-	TGGAGAAGCAGGGCACGTGCA			3.6424	4.24245	1.2909	1.7606	0.60855	1.4892	0.0606	0	0.0396	0.11745	0.1983	0
zma-MIR164g	chr6	138494602	138496369	-	TGGAGAAGCAGGGCACGTGCA			1.7988	2.9941	1.1597	0.586	1.18905	2.8157	0.19985	0.04075	0.12475	0.0207	0	0
zma-MIR164e	chr1	46853074	46853389	+	TGGAGAAGCAGGACACGTGAG	0	0	0	0	0	0	0	0	0	0	0	0	0	0
zma-MIR164f	chr4	176528358	176528665	+	TGGAGAAGCAGGGCACGTGCT	0	0	0	0	0	0	0	0	0	0	0	0	0	0
zma-MIR164h	chr8	118333942	118334360	+	TGGAGAAGCAGGGCACGTGTG	0	0	0	0	0	0	0	0	0	0	0	0	0	0
zma-MIR166a	chr6	84390146	84390630	-	TCGGACCAGGCTTCATTCCCC	2139473	20774.4	0.06195	0	0.02075	0	0.0536	0.0613	0	0	0	0	0	0
zma-MIR166b	chr1	223277274	223279354	-	TCGGACCAGGCTTCATTCCCC			1.36515	4.8266	0.5721	0.8403	12.2863	1.98265	13.1456	12.49	21.5968	0.8907	1.2182	25.5034
zma-MIR166c	chr4	150433862	150435645	+	TCGGACCAGGCTTCATTCCCC			7.0205	3.0899	5.48525	0.39845	10.4227	52.3201	4.48285	2.004	1.545	0.3854	1.0813	7.47985
zma-MIR166d	chr5	21952952	21955171	-	TCGGACCAGGCTTCATTCCCC			1.03465	9.54955	3.59035	5.2274	23.0449	7.58535	48.8201	42.7996	53.5038	4.08235	5.3724	177.936
zma-MIR166g	chr1	13558795	13559453	+	TCGGACCAGGCTTCATTCCCC			0	0.0661	0	0	0	0	0	0	0	0.44345	0	0
zma-MIR166h	chr1	274782675	274783986	-	TCGGACCAGGCTTCATTCCCC			0.1239	0.19345	0.14375	0.274	0.0744	0.08875	0.02125	0	0.18515	0.3385	0.02035	0.0652
zma-MIR166i	chr1	241356963	241357245	+	TCGGACCAGGCTTCATTCCCC			0	0	0	0	0	0	0	0	0	0	0	0
zma-MIR166j	chr7	124574756	124575307	+	TCGGACCAGGCTTCAATCCCT	j,k,n = 95315 m,l= 65315	j,k,n = 925.52 m,l = 634.21	0	0	0	0.02075	0.0518	0	0	0	0	0	0	0
zma-MIR166n	chr4	178166658	178170457	+	TCGGACCAGGCTTCAATCCCT			11.7126	13.6899	8.48355	3.58745	53.3041	115.274	37.9503	23.3306	30.9191	1.7168	9.25775	178.32
zma-MIR166km	chr5	210678299	210681927	-	k: TCGGACCAGGCTTCAATCCCT m: TCGGACCAGGCTTCATTCCTC			7.68715	10.4649	3.82455	0.5981	38.6833	44.9881	12.6939	5.60315	7.6581	0.725	2.9849	31.4421
zma-MIR166l	chr3	105560241	105560577	+	TCGGACCAGGCTTCATTCCTC			0	0	0	0	0	0	0	0	0	0	0	0
zma-MIR167ag	chr3	119194479	119197580	+	a: TGAAGCTGCCAGCATGATCTA g: TGAAGCTGCCAGCATGATCTG	a,b,c,d = 8222	79.8363	8.20915	17.8612	1.73555	2.68685	70.7209	1.3654	70.8239	23.0496	7.88815	0.45435	5.9338	7.45715
zma-MIR167b	chr5	7697100	7698507	+	TGAAGCTGCCAGCATGATCTA			2.1915	2.03675	1.9801	2.56935	1.12595	1.5301	0.71515	0.93455	0.6249	2.00725	0.61	0.70045
zma-MIR167c	chr5	4304021	4306230	+	TGAAGCTGCCAGCATGATCTA			26.7142	22.177	28.0533	10.1951	99.9649	8.63285	55.6364	31.4085	21.9976	1.18985	14.7677	23.6182
zma-MIR167d	chr1	287794195	287800179	-	TGAAGCTGCCAGCATGATCTA			170.17	214.001	121.982	32.7745	1411.17	175.923	828.329	397.649	218.618	77.9853	220.682	332.951
zma-MIR167e	chr7	9834831	9835506	-	TGAAGCTGCCAGCATGATCTG	e,f,g,h,i = 40	0.388403	0	0	0	0	0	0	0	0	0	0	0	0
zma-MIR167f	chr3	192151650	192151968	+	TGAAGCTGCCAGCATGATCTG			0	0	0	0	0	0	0	0	0	0	0	0
zma-MIR167h	chr6	93488905	93489650	-	TGAAGCTGCCAGCATGATCTG			0	0	0	0.02075	0	0	0.02125	0	0	0	0	0.0652
zma-MIR167i	chr9	110562346	110564735	+	TGAAGCTGCCAGCATGATCTG			0	0	0.0615	0.0415	0	0.03065	0.08025	0.24455	0.56845	0	0.13545	0.0326
zma-MIR168a	chr5	74368899	74370726	-	TCGCTTGGTGCAGATCGGGAC	16635	161.527	7.4189	7.39555	6.86365	7.4217	1.04975	0.92495	0.62705	0.6715	0.91405	2.79765	1.22805	1.404
zma-MIR168b	chr4	239637740	239639315	-	TCGCTTGGTGCAGATCGGGAC			40.1657	28.2565	50.7574	31.1897	15.1989	12.3927	11.2008	18.66	16.2112	57.0477	9.77475	8.0153
zma-MIR169a	chr3	37610359	37610688	+	CAGCCAAGGATGACTTGCCGA	1	0.00971008	0	0	0	0	0	0	0	0	0	0	0	0
zma-MIR169b	chr8	4792615	4794851	+	CAGCCAAGGATGACTTGCCGA			0	0.11015	0.02	0	0.01905	0	0	0	0.12475	0.3164	0.0407	0.03105
zma-MIR169c	chr2	11307184	11308738	+	CAGCCAAGGATGACTTGCCGG	20	0.194202	2.0458	6.05305	2.84265	2.51495	3.53615	3.00335	2.14625	1.05305	1.9205	16.0959	1.5404	1.04225
zma-MIR169r	chr9	109158784	109159109	-	CAGCCAAGGATGACTTGCCGG			0	0	0	0	0	0	0	0	0	0	0	0
zma-MIR169d	chr4	47481449	47481776	-	TAGCCAAGGA-GACT-GCCTATG	0	0	0	0.06245	0.06005	0	0	0	0	0	0	0	0	0
zma-MIR169eh	chr4	47540666	47541293	-	e: TAGCCAAGGA-GACT-GCCTACG h: TAGCCAAGGATGACTTGCCTA	e = 0 f,h = 20	0.194202	3.5783	3.40185	3.17835	2.2081	1.32955	1.28115	0.9449	1.1745	1.7253	0.5511	0.90585	1.3733
zma-MIR169f	chr5	164751551	164751900	+	TAGCCAAGGATGACTTGCCTA			0	0	0	0	0	0	0	0	0	0	0	0
zma-MIR169i	chr4	47269235	47270220	+	TAGCCAAGGATGACTTGCCTG	31	0.301012	0	0	0	0	0	0	0	0	0	0	0	0
zma-MIR169j	chr2	193349890	193350609	+	TAGCCAAGGATGACTTGCCTG			0.24855	0.6147	0.20305	0.3155	0.1798	0.02745	0.06215	0.06135	0.64355	0.3246	0.20985	0.12735
zma-MIR169k	chr7	135739893	135740882	-	TAGCCAAGGATGACTTGCCTG			0	0	0	0	0	0	0	0	0	0.0594	0.06105	0
zma-MIR169l	chr1	298356266	298356554	+	TAGCCAGGGATGATTTGCCTG	0	0	0	0	0	0	0	0	0	0	0	0	0	0
zma-MIR169p	chr7	111158173	111158437	-	TAGCCAAGGATGACTTGCCGG	1	0.00971008	0	0	0	0	0	0	0	0	0	0	0	0
zma-MIR169o	chr4	12923639	12924603	+	TAGCCAAGAATGACTTGCCTA	0	0	0	0	0	0	0	0	0	0	0	0	0	0
zma-MIR169m	chr3	96718668	96718968	-	TAGCCAAGAATGGCTTGCCTA	0	0	0	0	0	0	0	0	0	0	0	0	0	0
zma-MIR169n	chr3	230074790	230075652	+	TAGCCAAGAATGGCTTGCCTA			0	0	0	0	0	0	0	0	0	0	0	0
zma-MIR169q	chr8	126051563	126051868	+	TAGCCAAGAATGGCTTGCCTA			0.02075	0	0	0	0	0	0	0	0	0	0	0
zma-MIR171a	chr4	235054261	235055364	+	TGATTGAGCCGCGCCAATATC	1	0.00971008	0	0.41725	0	0	0	0	0	0	0	0.06215	0	0
zma-MIR171b	chr10	142397774	142399324	+	---TTGAGCCGTGCCAATATCACA	0	0	0	0.3464	0.08225	0	0.38345	0.70025	0.1243	0.14285	0.1387	0	0.26465	0.1584
zma-MIR171f	chr5	8550822	8552387	-	---TTGAGCCGTGCCAATATCACA			0	0	0.02075	0.1452	0	0.02745	0	0	0	0.04005	0	0
zma-MIR171c	chr2	8907775	8909208	+	TGACTGAGCCGTGCCAATATC	0	0	0.02075	0.04165	0	0	0.08635	0.11935	0	0	0	0.04145	0	0
zma-MIR171d	chr9	126502223	126503446	-	TGATTGAGCCGTGCCAATATC	1852	17.9831	3.45335	13.5902	0.68995	0.4868	11.464	1.94755	12.5886	13.0901	18.3616	0.16435	22.5261	14.125
zma-MIR171e	chr1	7949890	7951180	+	TGATTGAGCCGTGCCAATATC			5.37695	18.3167	0.37055	7.84765	8.45835	8.029	4.4238	4.74	8.66235	0.45025	15.5839	8.2532
zma-MIR171i	chr1	273359773	273360076	+	TGATTGAGCCGTGCCAATATC			0	0	0	0	0	0	0	0	0	0	0	0
zma-MIR171j	chr10	59887197	59888434	+	TGATTGAGCCGTGCCAATATC			0.2075	1.4524	0.14525	1.2654	0.3239	0.13725	0.78675	0	0.0396	0.22515	0.6107	0
zma-MIR171g	chr7	42495622	42496831	-	GAGGTGAGCCGAGCCAATATC	0	0	0.14495	0.46895	0.42835	0.1255	0.55195	0.2598	0.1471	0.2458	0.11885	0.1368	0.15935	0.1569
zma-MIR171h	chr2	17430069	17430392	-	----TGAGCCGAACCAATATCACTC	150	1.45651	0	0	0	0	0	0	0	0	0	0	0	0
zma-MIR171k	chr10	137341832	137342135	-	----TGAGCCGAACCAATATCACTC			0	0	0	0	0	0	0	0	0	0	0	0
zma-MIR172a	chr7	52516354	52516548	-	AGAATCTTGATGATGCTGCAT	54	0.524344	0	0	0	0	0	0	0	0	0	0	0	0
zma-MIR172b	chr5	215901370	215902760	-	AGAATCTTGATGATGCTGCAT			0	0.02205	0.02075	0	0	0	0	0	0	0.0207	0	0
zma-MIR172c	chr4	171155095	171156936	+	AGAATCTTGATGATGCTGCAT			0.58045	8.1755	4.2262	2.9487	2.6275	2.33375	0.83475	0.9556	2.9867	23.5437	10.148	1.14315
zma-MIR172d	chr6	168018533	168018806	+	AGAATCTTGATGATGCTGCAT			0	0	0	0	0	0	0	0	0	0	0	0
zma-MIR172e	chr3	144917919	144919725	+	GGAATCTTGATGATGCTGCAT	87	0.844777	0.0621	3.15585	0.12375	1.09945	0.2096	0.25345	0.5114	0	0.05945	1.2044	0.30535	0
zma-MIR319a	chr3	212197828	212198527	+	TTGGACTGAAGGGTGCTCCCT	56065	544.396	0.70355	0.0857	0.9152	0.78045	0.4162	0.2017	0.09995	0.0412	0	0.1548	0	0
zma-MIR319b	chr3	2801532	2803512	+	TTGGACTGAAGGGTGCTCCCT			0.06225	1.24055	0.0415	0.20745	0.13335	0.1647	0	0	0	1.5502	0.08145	0
zma-MIR319c	chr8	147814582	147815960	-	TTGGACTGAAGGGTGCTCCCT			14.763	6.9791	18.3255	18.3913	1.9136	1.7867	0.98345	0.1219	0.43685	20.5978	0.25935	0.0932
zma-MIR319d	chr8	26771521	26773278	-	TTGGACTGAAGGGTGCTCCCT			9.14525	12.5264	14.1059	1.58735	2.8264	5.45845	1.0354	0.1013	0.2179	3.0457	0.3408	0.16305
zma-MIR390a	chr1	292655523	292656182	+	AAGCTCAGGAGGGATAGCGCC	1936	18.7987	0.08255	0.06245	0.103	0.0415	0.82465	0.0549	0.80325	0.20505	0.0198	0.0207	0.0372	1.12585
zma-MIR390b	chr5	2764004	2764395	+	AAGCTCAGGAGGGATAGCGCC			0	0	0	0	0	0	0.01965	0	0	0	0	0
zma-MIR393a	chr2	754072	754716	+	TCCAAAGGGATCGCATTGATC	55	0.534054	0	0	0	0	0	0	0	0	0	0.0608	0	0
zma-MIR393b	chr3	18647040	18647347	+	TCCAAAGGGATCGCATTGATC			0	0	0	0	0	0	0	0	0	0	0	0
zma-MIR393c	chr10	148152180	148152842	-	TCCAAAGGGATCGCATTGATC			0	0.13215	0	0.2282	0.05535	0	0	0	0	3.6799	0	0
zma-MIR394a	chr5	193871920	193877364	+	TTGGCATTCTGTCCACCTCC	1747	16.9635	13.8423	11.8282	13.2106	32.5173	5.1348	2.0561	4.6953	4.47985	8.20255	25.2153	11.6255	0.85735
zma-MIR394b	chr4	154193355	154199082	+	TTGGCATTCTGTCCACCTCC			19.6712	36.3328	21.8994	33.9467	29.449	19.6799	23.2775	18.7133	46.6459	2.4031	206.708	19.7038
zma-MIR395abehij	chr2	6332911	6334891	-	GTGAAGTGTTTGGGGGAACTC	0 o = 0	0.00 o = 0.00	0	0	0	0	0.01905	0.03065	0	0	0	0.0995	0	0
zma-MIR395df g	chr2	6322790	6323715	-	GTGAAGTGTTTGGGGGAACTC			0	0	0	0	0	0	0	0	0	0.0207	0	0
zma-MIR395nop	chr10	144171100	144171879	+	n,p: GTGAAGTGTTTGGGGGAACTC o: GTGAAGTGTTTGGGTGAACTC			0	0	0	0	0	0	0	0	0	0.66335	0	0
zma-MIR395cklm	chr10	79184966	79185749	-	k: GTGAAGTGTTTGAGGAAACTC c,l,m: GTGAAGTGTTTGGAGGAACTC	k = 0 c,l,m = 0	k = 0.00 c,l,m = 0.00	0	0	0	0	0	0	0	0	0	0	0	0
zma-MIR396a	chr4	173324326	173325113	+	TTCCACAGCTTTCTTGAACTG	abg = 586 h = 0	abg = 5.69 h = 0	2.11065	1.5998	2.584	2.71805	0.3078	0.25025	0.03935	0	0.0198	0.01935	0.05755	0
zma-MIR396bh	chr9	15367051	15367681	-	b: TTCCACAGCTTTCTTGAACTG h: TCCCACAGCTTTATTGAACTG			0.1857	0.23145	0.04075	0	0.10895	0.413	0	0	0	0.47645	0.02035	0
zma-MIR396g	chr5	214398294	214399712	-	TTCCACAGCTTTCTTGAACTG			0.04135	0.04165	0.10225	0.0415	0	0	0	0	0	0.08285	0	0
zma-MIR396c	chr2	1961553	1963074	-	-TCCACAGGCTTTCTTGAACTG	55	0.534054	0	0	0	0	0	0	0	0	0	0.14365	0	0
zma-MIR396d	chr10	147337612	147339036	+	-TCCACAGGCTTTCTTGAACTG			0	0.0845	0	0	0	0	0	0	0	0.1229	0	0
zma-MIR396e	chr4	173328740	173329853	-	TTCCACAGCTTTCTTGAACTT	23	0.223332	1.32625	0.48215	1.60065	2.24985	0.0881	0.02745	0	0	0	0.04005	0	0
zma-MIR396f	chr5	214389023	214390431	+	TTCCACAGCTTTCTTGAACTT			0.02075	0.30715	0.10375	0.02075	0	0	0	0	0	0.51675	0	0
zma-MIR397b	chr5	82459596	82459879	-	TTGAGCGCAGCGTTGATGAGC	34	0.330143	0	0	0	0	0	0	0	0	0	0	0	0
zma-MIR398a	chr2	170162880	170164018	+	TGTGTTCTCAGGTCGCCCCCG	37	0.360244	0	0	0	0	0	0	0	0	0	0	0	0
zma-MIR398b	chr7	38552530	38554512	+	TGTGTTCTCAGGTCGCCCCCG			0.0206	0	0.0415	0	0	0	0.0425	0	0	0	0	0
zma-MIR399a	chr4	229179776	229180098	-	TGCCAAAGGAGAATTGCCCTG	8	0.0776806	0	0	0.02	0	0	0	0	0	0	0	0	0
zma-MIR399c	chr6	159890056	159890462	+	TGCCAAAGGAGAATTGCCCTG			0	0	0	0	0	0	0	0	0	0	0	0
zma-MIR399h	chr5	146933637	146933930	+	TGCCAAAGGAGAATTGCCCTG			0	0	0	0	0	0	0	0	0	0	0	0
zma-MIR399b	chr4	154742786	154743329	-	TGCCAAAGGAGAGCTGTCCTG	18	0.174781	0	0	0	0	0	0	0	0	0	0	0	0
zma-MIR399d	chr3	189262018	189262960	+	TGCCAAAGGAGAGCTGCCCTG	0	0	0	0	0	0	0	0	0	0	0	0	0	0
zma-MIR399e	chr2	16352969	16353292	-	TGCCAAAGGAGAGTTGCCCTG	18	0.179636	0	0	0	0	0	0	0	0	0	0	0	0
zma-MIR399i	chr5	146942583	146942873	+	TGCCAAAGGAGAGTTGCCCTG			0	0	0	0	0	0	0	0	0	0	0	0
zma-MIR399j	chr9	24378360	24378734	-	TGCCAAAGGAGAGTTGCCCTG			0	0	0	0	0	0	0	0	0	0	0	0
zma-MIR399f	chr6	159882281	159882585	-	TGCCAAAGGAAATTTGCCCCG	13	0.126231	0.0206	0.02205	0.04075	0	0	0	0	0	0	0	0	0
zma-MIR399g	chr4	229180976	229181243	+	TGCCAAAGGGGATTTGCCCGG	0	0	0	0	0	0	0	0	0	0	0	0	0	0
zma-MIR408	chr8	38493863	38494670	-	CTGCACTGCCTCTTCCCTGGC	70	0.679705	0.2478	0.0833	0.16305	0.3219	0.05535	0.1098	0.01965	0	0.0198	0.0995	0.02035	0
zma-MIR482	chr1	157998126	157998447	+	TCTTCCTTGTTCCTCCCATT	0	0	0	0	0	0	0	0	0	0	0	0	0	0
zma-MIR528a	chr1	6408923	6409691	+	TGGAAGGGGCATGCAGAGGAG	38	0.368983	0	0	0.06225	0.083	0.01905	0.03065	0.1424	0.12355	0	0	0.0744	0.0326
zma-MIR528b	chr9	153752240	153752517	-	TGGAAGGGGCATGCAGAGGAG			0	0	0	0	0	0	0	0	0	0	0	0
zma-MIR529	chr5	160612859	160614080	+	AGAAGAGAGAGAGTACAGCCT	459	4.45693	0	0	0	0	0	0	0	0	0	0	0	0
zma-MIR827	chr5	167387997	167389055	-	TTAGATGACCATCAGCAAACA	1099	10.6714	0	0.0881	0	0.0218	0	0.0919	0.01965	0.24205	1.3426	0.616	0.1576	0.12885
zma-MIR1432	chr7	160483468	160484946	-	TCAGGAGAGATGACACCGACG	8	0.0776806	0	0.1518	0.04075	0.1867	0	0.08235	0.02125	0	0	3.0337	0.16285	0
zma-MIR2118a	chr10	117749785	117750102	-	TTCCTGATGCCTCTCATTCCTA	0	0	0	0	0	0	0	0	0	0	0	0	0	0
zma-MIR2118bd	chr2	49919069	49919739	+	b: TTCCCGATGCCTCCCATTCCTA d: TTCCTGATGCCTCCCATGCCTA	b = 80 d = 26	b = 0.78 d = 0.25	0	0	0	0	0.01725	0.03065	0	0	0	0	0	0
zma-MIR2118c	chr10	117773076	117774034	-	TTCCTAATGCCTCCCATTCCTA	13	0.126231	1.2826	0.9599	1.322	1.03805	0.0744	0.5196	0.2982	0.24205	0.7436	0.2611	0.4313	0.2827
zma-MIR2118ef	chr10	117699691	117700033	-	e: TTCCTGATGTCTCCCATTCCTA f: TTCCCAATGCCTTCCATGCCTA	e = 0 f = 0	e = 0.00 f = 0.00	0	0	0	0	0	0	0	0	0	0	0	0
zma-MIR2118g	chr2	49985297	49985896	+	TTCCTGATGCCTCCTATTCCTA	6	0.0582605	0	0	0	0	0	0	0	0	0	0	0	0
zma-MIR2275ab	chr4	30230971	30231840	+	a: AGAGTTGGAGGAAAGCAAACC b: AGGATTAGAGGCAACTGAACC	a = 2 b = 59	a = 0.02 b = 0.57	0.02075	0	0	0	0	0	0	0	0	0.1022	0	0
zma-MIR2275c	chr10	71470294	71470816	+	AGGATTAGAGGGACTTGAACC	0	0	0	0	0	0	0	0	0	0	0	0	0	0
zma-MIR2275d	chr2	202064367	202064686	+	AGAGTTGGAGGAAAGAAAACT	0	0	0.41275	0.4565	0.34755	0.2543	1.02945	0.23235	0.31235	0.18365	0.1585	0.29845	0.13725	0.09625

## Sheet: Dataset 2
Supplemental Dataset 2 Expression of genes involved in miRNA biology
Gene name	Arabidopsis Gene ID	Maize Gene ID	Meristem (RPM)	L1 (RPM)	L2 (RPM)	Central zone (RPM)	P0 (RPM)	Internode (RPM)	P1 (RPM)	P2 (RPM)	P3 (RPM)	Vasc. (RPM)	Adaxial (RPM)	Abaxial (RPM)
primary miRNA Biogenesis
CBP20	AT5G44200	GRMZM2G052341	2.05	1.55	1.85	2.1	2.6	2	1.55	1.75	0.25	2.3	0.85	1.85
		GRMZM2G034804	89.8	106.5	84.3	97.9	122.4	111.5	109.55	107.2	109	98.65	93.95	99.9
CBP80	AT2G13540	GRMZM2G083689	145.6	176.55	141.9	164.85	188.8	197.25	169.55	163.8	179.65	170.4	132.3	150.1
DDL	AT3G20550	GRMZM2G113156	86.2	74.95	95.4	92.7	77.15	71.15	73	78.55	69.4	56.4	59.75	74.25
CPL1	AT4G21670	GRMZM2G588223	56.7	67.2	51.3	92.75	79.5	70	53.55	50	42.4	50.35	41.85	44.55
		GRMZM2G120373	31	41.55	24.7	68.75	44.2	39.8	40.2	36.8	32.8	39.4	20.95	25.7
NOT2b	AT5G59710	GRMZM2G091143	62.5	69.85	57.7	78.8	50	56.2	46.4	41.8	61.5	48.05	33.9	33.85
NOT2a	AT1G07705	GRMZM2G010357	40	59.25	51.75	46.6	66.15	68.55	69.35	77.1	59.7	61.7	51.6	59.8
		GRMZM2G091143	62.5	69.85	57.7	78.8	50	56.2	46.4	41.8	61.5	48.05	33.9	33.85
		GRMZM2G347270	0	0	0.05	0	0.05	0	0	0.1	0	0.05	0	0.05
miRNA processing
DCL1	AT1G01040	GRMZM2G040762	47.7	41.5	53.95	27.55	66.3	83.95	61.8	55.65	39.4	21.1	43.25	80.85
SE	AT2G27100	GRMZM2G377165	46.55	48.35	36.55	44.55	45.7	43.1	46.8	38.65	50.15	38.7	37.6	27.85
		GRMZM2G132780	61.95	60.45	42.4	61.25	46.6	55.2	43.5	35.2	66.35	44.4	37.65	45.25
		GRMZM5G817439	50.45	51.75	49.8	65.35	60.9	50.8	56.9	51.3	51.5	47.95	47.75	53.65
		GRMZM2G156099	28.8	26.95	22.95	31.2	28.05	29.2	24.05	18.35	21.75	16.1	24.3	23.15
		GRMZM2G400655	0	0	0	0	0	0	0	0	0	0	0	0
HYL1/DRB1	AT1G09700	GRMZM2G444808	111.65	85.75	124.05	100.1	77.95	123.35	93.75	115.85	85.4	100.9	84.55	103.75
TGH	AT5G23080	GRMZM2G131482	22.45	21.55	23	25.25	18.2	18.35	16.7	15.35	14.15	13.3	13	13.75
MOS2	AT1G33520	GRMZM5G882351	36.5	26.85	39.85	27.85	35.2	36.2	37.4	39.85	22.4	28.75	20.7	24.65
SIC	AT4G24500	GRMZM2G174736	26.85	25.8	24.65	23	22.55	26.8	25.2	27.65	28.55	23.5	22.5	24.3
HEN1	AT4G20910	GRMZM5G877925	0	0	0	0	0.05	0.05	0	0	0	0	0	0
		GRMZM2G395771	0	0	0	0	0	0	0	0	0	0	0	0
		GRMZM2G107457	70.15	50.75	59.5	80.8	36.1	46.7	37.2	31.25	40.3	33.1	38	39.7
		GRMZM2G120661	0	0	0	0	0	0	0	0	0	0	0.05	0
HST	AT3G05040	GRMZM2G043238	1.8	1.95	3.8	1.2	3.35	3.4	3.6	2.7	0.9	3.1	2.05	1.7
miRNA activity
AGO1	AT1G48410	AC209206.3_FG011	27.45	25.3	25.8	12.05	81.3	55.55	64.3	52.25	55.8	25.55	59.85	70.5
		GRMZM2G039455	286.85	367.9	247.4	110.25	881.65	489.55	680.55	622.6	610.6	297.95	472.55	555.25
		GRMZM2G162525	156.5	141.05	142.6	175.25	138.1	185.4	100.35	81.95	81.45	155.85	80.75	83.5
		GRMZM2G441583	215.9	160.8	191.65	202.85	127.6	165.05	94.65	83.9	85.9	112.35	98.45	95.55
		GRMZM2G361518	2.3	2.5	4.25	0.75	0.6	0.9	0.7	1.1	0.55	2.5	0.75	2.1
AGO10	AT5G43810	AC189879.3_FG003	16.95	32.05	21.35	20.65	63.9	23.6	67	64.45	92.05	103.65	123.05	20.55
		GRMZM2G079080	18.55	36.45	14.9	11.5	92.7	18.75	57.6	56	53.25	24.5	48.75	11.1
SQN	AT2G15790	GRMZM2G329306	120.4	93.05	118.75	217.85	108.3	67.5	119.05	119.15	58.65	65.1	45.35	38
VCS	AT3G13300	GRMZM2G029186	173.15	124.1	157.55	189.15	136.65	143.8	130.35	117.3	104.4	103.55	105.5	112.4
		GRMZM2G092085	50.7	56.55	52.95	61.7	46.7	55.55	46.9	45.5	54.95	43.15	44.8	51.35
SUO	AT3G48050	GRMZM2G162859	0	0	0	0	0	0	0	0	0	0	0	0
		AC234158.1_FG005	5	3.4	5.2	6.1	6.9	6.35	6.4	4.55	3.6	5.25	4.5	4.3
DRB2	AT2G28380	GRMZM2G027462	133.25	181.95	95.35	135.2	102.85	122.15	122.15	122.45	122.35	64.6	186.55	211.35
AMP1	AT3G54720	GRMZM2G010353	24.7	22.1	24.25	37	14.5	20.1	14.5	15.35	12.65	18.05	14.4	15.6
ATMP1	AT5G19740	GRMZM2G159171	17.2	15.4	14.7	17.4	9.6	15.6	13.45	9.95	14.35	14.45	18.55	23.25
		GRMZM5G815165	11	12.75	8.85	12.85	9.65	12.8	8.85	6.9	15.15	9.25	11	10.85
		GRMZM2G118806	30.5	26.5	21.7	24.9	11.8	20.45	11.9	11.75	24.45	17	14.35	16.4
KATANIN	AT5G23430	GRMZM2G160702	80.15	91.4	80.45	80.4	68.7	73.8	62.7	64.2	77.6	82.3	73.65	78.05
		GRMZM2G406553	71.5	65.7	65.1	88.1	56.4	71.1	57.6	50.1	69.25	70.15	57.25	63
		GRMZM2G558078	0	0	0	0	0	0	0	0	0	0	0	0
miRNA turnover
SDN1	AT3G50100	GRMZM2G082097	4.5	5.05	5.55	3.55	3.95	3.95	6.75	3.6	4.95	2.95	2.2	2.4
HESO1	AT2G39740	GRMZM2G014452	51.7	51.4	34.4	59.25	30.05	30.3	29.7	22.75	46.5	147.65	37.95	33.3
target turnover
XNR4	AT1G54490	GRMZM2G099630	110.85	95.45	103.65	87.25	97.1	124.95	83.6	85.65	101.85	99.75	81.4	79.85
DCP1	AT1G08370	GRMZM2G101596	34.5	37.1	26.55	41.1	29.35	32.2	24.5	21.1	24.35	19	19.35	22.15
		GRMZM2G144618	31.35	35.55	29.65	37.85	44.8	49.75	37.55	32.6	44.8	34.75	32.7	34.4
		GRMZM2G131120	0.05	0	0.1	0	0	0.1	0.05	0	0.05	0	0	0.05
		GRMZM2G348866	42.95	30.9	38.9	36.1	25.25	26.15	30.75	32.85	31.05	34.65	33.65	31.6
		GRMZM2G011173	13	14.35	10.8	12.3	10.85	10.25	8.5	7.6	13.25	11.25	9	8.85
DCP2	AT5G13570	GRMZM2G150209	116.3	87.6	99.8	141.55	78.8	72.7	71.95	64.15	90.75	82.35	83.7	87.85
		GRMZM2G051756	0	0	0	0	0	0	0	0	0	0	0	0

## Sheet: Dataset 3
Supplemental Dataset 3: Expression profile and degradome validation of miRNA targets
Blue highlight, non-conserved target; N/A, expression values are not avaiable for genes outside the filtered gene set
Gene ID	Targeted by	Mapman Annotation	Meristem (RPM)	L1 (RPM)	L2 (RPM)	Central zone (RPM)	P0 (RPM)	Internode (RPM)	P1 (RPM)	P2 (RPM)	P3 (RPM)	Vasc. (RPM)	Adaxial (RPM)	Abaxial (RPM)	Target Finder Score	Rep1_WT short (RP15M)	Rep2_WT short (RP15M)	Mean_WT short (RP15M)	Mean_WT Long (RP15M)	Ratio
AC233751.1_FG002	zma-MIR156abcdefghil; zma-MIR156j; zma-MIR156k	'very weakly similar to (87.8) AT5G50570 | Symbols: | squamosa promoter-binding protein, putative | chr5:20582555-20583791 REVERSEmoderately similar to ( 229) loc_os08g41940 12008.m08172 protein teosinte glume architecture 1, putative, expressed seq=cds; coord=4:44780143..44784469:-1; parent_gene=AC233751.1_FG002'	1.25	1.55	1.15	0.6	1.35	1.4	1.2	1.5	1.05	1.05	3	1.05	1	14.75	10.75	12.75	17.5	0.729
GRMZM2G061734	zma-MIR156abcdefghil; zma-MIR156j; zma-MIR156k	'weakly similar to ( 109) loc_os09g32944 12009.m06381 protein teosinte glume architecture 1, putative, expressed seq=cds; coord=2:192161061..192162776:1; parent_gene=GRMZM2G061734'	19.15	16.05	17	7.15	23.05	15.65	14.7	13.05	12.1	5.25	9.55	13.55	1	99.75	118.25	109	119.5	0.912
GRMZM2G065451	zma-MIR156abcdefghil; zma-MIR156j; zma-MIR156k	'weakly similar to ( 132) AT5G43270 | Symbols: SPL2 | SPL2 (SQUAMOSA PROMOTER BINDING PROTEIN-LIKE 2); DNA binding / transcription factor | chr5:17360527-17362143 REVERSEvery weakly similar to (99.8) LG1_MAIZE LIGULELESS1 protein - Zea mays (Maize)moderately similar to ( 272) loc_os02g04680 12002.m33546 protein squamosa promoter-binding-like protein 10, putative, expressed seq=cds; coord=4:237774…	68.55	72.6	68.85	65.05	30.05	58.75	64.45	81.75	74.2	65.15	97.25	76.65	1	53.25	66.25	59.75	65.5	0.912
GRMZM2G067624	zma-MIR156abcdefghil; zma-MIR156j; zma-MIR156k	seq=cds; coord=7:151217709..151219397:-1; parent_gene=GRMZM2G067624'	47.25	17.75	59.8	10.3	39.15	63	41.5	58.45	46.75	31.2	62.6	63.1	2	1327	1586	1456.5	1524	0.956
GRMZM2G097275	zma-MIR156abcdefghil; zma-MIR156j; zma-MIR156k	'weakly similar to ( 147) AT5G43270 | Symbols: SPL2 | SPL2 (SQUAMOSA PROMOTER BINDING PROTEIN-LIKE 2); DNA binding / transcription factor | chr5:17360527-17362143 REVERSEweakly similar to ( 102) LG1_MAIZE LIGULELESS1 protein - Zea mays (Maize)moderately similar to ( 390) loc_os02g04680 12002.m33546 protein squamosa promoter-binding-like protein 10, putative, expressed seq=cds; coord=5:77940666..7…	27.4	18.75	28.6	23.05	17.75	22.45	15.8	13.35	17.1	11.35	22.55	18.2	1	305	227.5	266.25	273.75	0.973
GRMZM2G101511	zma-MIR156abcdefghil; zma-MIR156j; zma-MIR156k	'moderately similar to ( 224) loc_os08g41940 12008.m08172 protein teosinte glume architecture 1, putative, expressed seq=cds; coord=4:44509046..44512898:1; parent_gene=GRMZM2G101511'	0.35	2	0.35	0.3	0.95	4.5	1.35	4.15	5.85	1.25	9.95	3.4	1	14.75	10.75	12.75	17.5	0.729
GRMZM2G106798	zma-MIR156abcdefghil; zma-MIR156j; zma-MIR156k	'weakly similar to ( 137) AT5G50570 | Symbols: | squamosa promoter-binding protein, putative | chr5:20582555-20583791 REVERSEweakly similar to ( 120) SBP1_ANTMA Squamosa promoter-binding protein 1 - Antirrhinum majus (Garden snapdragon)weakly similar to ( 155) loc_os08g41940 12008.m08172 protein teosinte glume architecture 1, putative, expressed seq=cds; coord=4:17489205..17501119:1; parent_gene=…	35.1	23.4	28.4	29.85	12.9	15.55	12.3	15.5	17	17.5	19.45	18.95	1	11	20	15.5	19.5	0.795
GRMZM2G113779	zma-MIR156abcdefghil; zma-MIR156j; zma-MIR156k	'weakly similar to ( 117) AT3G15270 | Symbols: SPL5 | SPL5 (SQUAMOSA PROMOTER BINDING PROTEIN-LIKE 5); DNA binding / transcription factor | chr3:5140624-5141256 REVERSEweakly similar to ( 126) SBP1_ANTMA Squamosa promoter-binding protein 1 - Antirrhinum majus (Garden snapdragon)weakly similar to ( 130) loc_os07g32170 12007.m29185 protein SBP domain containing protein, expressed seq=cds; coord=2:2…	0.9	2.45	1.1	0.95	2.25	2.4	2.5	3.8	4.6	1.6	7.1	5.35	2	34.75	25.25	30	37	0.811
GRMZM2G126018	zma-MIR156abcdefghil; zma-MIR156j; zma-MIR156k	'weakly similar to ( 154) AT2G42200 | Symbols: SPL9 | SPL9 (SQUAMOSA PROMOTER BINDING PROTEIN-LIKE 9); transcription factor | chr2:17587601-17589451 FORWARDweakly similar to ( 114) SBP2_ANTMA Squamosa promoter-binding protein 2 - Antirrhinum majus (Garden snapdragon)moderately similar to ( 281) loc_os09g31438 12009.m06260 protein squamosa promoter-binding-like protein 9, putative, expressed seq=c…	15.45	7.45	15.6	9.6	15.75	27.15	19.7	20.35	18.8	13.8	10.05	22.7	1	1079	1414.5	1246.75	1300	0.959
GRMZM2G126827	zma-MIR156abcdefghil; zma-MIR156j; zma-MIR156k	'weakly similar to ( 157) AT5G43270 | Symbols: SPL2 | SPL2 (SQUAMOSA PROMOTER BINDING PROTEIN-LIKE 2); DNA binding / transcription factor | chr5:17360527-17362143 REVERSEweakly similar to ( 115) LG1_MAIZE LIGULELESS1 protein - Zea mays (Maize)moderately similar to ( 275) loc_os06g45310 12006.m09058 protein squamosa promoter-binding-like protein 11, putative, expressed seq=cds; coord=5:86783062..8…	0	0	0	0	0	0	0	0	0	0	0	0	2	68.5	41	54.75	84.25	0.65
GRMZM2G148467	zma-MIR156abcdefghil; zma-MIR156j; zma-MIR156k	'weakly similar to ( 132) AT2G33810 | Symbols: SPL3 | SPL3 (SQUAMOSA PROMOTER BINDING PROTEIN-LIKE 3); DNA binding / transcription factor | chr2:14305342-14305828 FORWARDweakly similar to ( 125) SBP1_ANTMA Squamosa promoter-binding protein 1 - Antirrhinum majus (Garden snapdragon)moderately similar to ( 229) loc_os04g46580 12004.m09607 protein SBP domain containing protein, expressed seq=cds; coo…	0.6	1.65	1.05	0.4	0.95	0.7	2.25	5	8	5.45	6	16.6	1	9	6.5	7.75	9.5	0.816
GRMZM2G156621	zma-MIR156abcdefghil; zma-MIR156j; zma-MIR156k	'weakly similar to ( 157) AT5G43270 | Symbols: SPL2 | SPL2 (SQUAMOSA PROMOTER BINDING PROTEIN-LIKE 2); DNA binding / transcription factor | chr5:17360527-17362143 REVERSEweakly similar to ( 115) LG1_MAIZE LIGULELESS1 protein - Zea mays (Maize)moderately similar to ( 275) loc_os06g45310 12006.m09058 protein squamosa promoter-binding-like protein 11, putative, expressed seq=cds; coord=5:131187462..…	0	0	0	0	0	0	0	0	0	0	0	0	2	68.5	41	54.75	84.25	0.65
GRMZM2G160917	zma-MIR156abcdefghil; zma-MIR156j; zma-MIR156k	'weakly similar to ( 138) AT2G42200 | Symbols: SPL9 | SPL9 (SQUAMOSA PROMOTER BINDING PROTEIN-LIKE 9); transcription factor | chr2:17587601-17589451 FORWARDweakly similar to ( 113) SBP1_ANTMA Squamosa promoter-binding protein 1 - Antirrhinum majus (Garden snapdragon)weakly similar to ( 155) loc_os09g31438 12009.m06260 protein squamosa promoter-binding-like protein 9, putative, expressed seq=cds; …	167.35	74.1	136.5	77.55	59.4	90.3	58.05	54.6	71.9	34.5	63.95	80.45	1	1079	1414.5	1246.75	1301	0.958
GRMZM2G163813	zma-MIR156abcdefghil; zma-MIR156j; zma-MIR156k	'very weakly similar to (93.6) loc_os06g45310 12006.m09058 protein squamosa promoter-binding-like protein 11, putative, expressed seq=cds; coord=4:235598303..235601156:-1; parent_gene=GRMZM2G163813'	21.65	19.65	19.8	18.45	22.15	32.9	14.85	13.75	18.1	14.6	17.1	17.75	1	72.75	105.25	89	106.5	0.836
GRMZM2G307588	zma-MIR156abcdefghil; zma-MIR156j; zma-MIR156k	'weakly similar to ( 147) AT2G42200 | Symbols: SPL9 | SPL9 (SQUAMOSA PROMOTER BINDING PROTEIN-LIKE 9); transcription factor | chr2:17587601-17589451 FORWARDweakly similar to ( 114) SBP2_ANTMA Squamosa promoter-binding protein 2 - Antirrhinum majus (Garden snapdragon)moderately similar to ( 326) loc_os09g31438 12009.m06260 protein squamosa promoter-binding-like protein 9, putative, expressed seq=c…	39.35	14.8	34.5	15.65	49.05	26.55	34.45	30.75	25.45	14.15	15	28.55	1	1079	1414.5	1246.75	1306.5	0.954
GRMZM2G371033	zma-MIR156abcdefghil; zma-MIR156j; zma-MIR156k	'weakly similar to ( 131) AT5G50570 | Symbols: | squamosa promoter-binding protein, putative | chr5:20582555-20583791 REVERSEvery weakly similar to (95.1) LG1_MAIZE LIGULELESS1 protein - Zea mays (Maize)moderately similar to ( 227) loc_os01g69830 12001.m13033 protein teosinte glume architecture 1, putative, expressed seq=cds; coord=8:161522745..161525837:-1; parent_gene=GRMZM2G371033'	1.15	3.05	0.5	1.05	1.15	0.25	0.7	1.1	0.6	4.7	0.75	0.05	1	202.25	115.75	159	172.75	0.92
GRMZM2G414805	zma-MIR156abcdefghil; zma-MIR156j; zma-MIR156k	'weakly similar to ( 131) AT5G43270 | Symbols: SPL2 | SPL2 (SQUAMOSA PROMOTER BINDING PROTEIN-LIKE 2); DNA binding / transcription factor | chr5:17360527-17362143 REVERSEvery weakly similar to (90.9) LG1_MAIZE LIGULELESS1 protein - Zea mays (Maize)moderately similar to ( 357) loc_os06g49010 12006.m091569 protein squamosa promoter-binding-like protein 11, putative, expressed seq=cds; coord=5:58055…	51.15	39.1	50.3	38.6	53.65	76.8	57.55	55.9	58.3	38.75	57.6	60.85	1	214.75	276.75	245.75	258	0.953
GRMZM2G460544	zma-MIR156abcdefghil; zma-MIR156j; zma-MIR156k	'weakly similar to ( 141) AT2G42200 | Symbols: SPL9 | SPL9 (SQUAMOSA PROMOTER BINDING PROTEIN-LIKE 9); transcription factor | chr2:17587601-17589451 FORWARDweakly similar to ( 116) SBP2_ANTMA Squamosa promoter-binding protein 2 - Antirrhinum majus (Garden snapdragon)moderately similar to ( 347) loc_os08g39890 12008.m07969 protein squamosa promoter-binding-like protein 9, putative, expressed seq=c…	62.8	46.15	50.85	33.65	33.4	28.6	20.15	20.55	30.15	17	20.75	22.45	1	1079	1414.5	1246.75	1304.75	0.956
GRMZM5G806833	zma-MIR156abcdefghil; zma-MIR156j; zma-MIR156k	'weakly similar to ( 152) loc_os09g32944 12009.m06381 protein teosinte glume architecture 1, putative, expressed seq=cds; coord=7:136328788..136330155:-1; parent_gene=GRMZM5G806833'	10.2	10.15	8.85	4.95	10.5	6.75	10.3	13.4	16.9	7.8	24.8	18.35	1	99.75	118.25	109	121.75	0.895
GRMZM5G878561	zma-MIR156abcdefghil; zma-MIR156j; zma-MIR156k	'weakly similar to ( 139) AT5G50570 | Symbols: | squamosa promoter-binding protein, putative | chr5:20582555-20583791 REVERSEweakly similar to ( 103) LG1_MAIZE LIGULELESS1 protein - Zea mays (Maize)moderately similar to ( 290) loc_os01g69830 12001.m13033 protein teosinte glume architecture 1, putative, expressed seq=cds; coord=3:159377754..159382446:-1; parent_gene=GRMZM5G878561'	1.85	1.9	1.2	1.85	1.35	0.75	0.9	1.35	1.4	0.5	1.55	2.5	1	202.25	115.75	159	188.5	0.844
AC217264.3_FG005	zma_MIR159abfjk; zma_MIR159cd; zma_MIR159e	'moderately similar to ( 212) AT2G32460 | Symbols: MYB101, ATMYB101, ATM1 | MYB101; DNA binding / transcription factor | chr2:13782419-13784359 REVERSEmoderately similar to ( 207) GAM1_ORYSA Transcription factor GAMYB (OsGAMyb) - Oryza sativa (Rice)moderately similar to ( 341) loc_os03g38210 12003.m08921 protein myb-like DNA-binding domain containing protein, expressed seq=cds; coord=1:246031095.…	0	0	0	0	0	0	0	0	0	0	0	0	0
GRMZM2G004090	zma-MIR159abfjk; zma-MIR159hi; zma-MIR159cd; zma-MIR159g; zma-MIR159e; zma-MIR319abcd	'weakly similar to ( 175) AT2G32460 | Symbols: MYB101, ATMYB101, ATM1 | MYB101; DNA binding / transcription factor | chr2:13782419-13784359 REVERSEweakly similar to ( 181) GAM1_ORYSA Transcription factor GAMYB (OsGAMyb) - Oryza sativa (Rice)moderately similar to ( 215) loc_os06g40330 12006.m08569 protein myb-like DNA-binding domain containing protein, expressed seq=cds; coord=9:90125460..90132277…	0.2	0.15	0.15	0.55	0.25	0.1	0.25	0.15	0.05	0.15	0.2	0.15	2.5	6	5	5.5	5.75	0.957
GRMZM2G028054	zma_MIR159abfjk; zma_MIR159cd; zma_MIR159e; zma_MIR159g; zma_MIR159hi; zma-MIR319abcd;	'moderately similar to ( 226) AT3G11440 | Symbols: ATMYB65, MYB65 | MYB65 (MYB DOMAIN PROTEIN 65); DNA binding / transcription factor | chr3:3603056-3604929 FORWARDhighly similar to ( 609) GAM1_ORYSA Transcription factor GAMYB (OsGAMyb) - Oryza sativa (Rice)highly similar to ( 609) loc_os01g59660 12001.m42740 protein transcription factor GAMYB, putative, expressed seq=cds; coord=8:171172099..1711…	26.25	16.3	20.75	17.35	18.65	32.8	8.3	6.65	8	5.4	7.8	12.95	3
GRMZM2G046443	zma_MIR159abfjk; zma_MIR159cd	'weakly similar to ( 182) AT3G60460 | Symbols: DUO1 | DUO1 (DUO POLLEN 1); DNA binding / transcription factor | chr3:22342429-22343491 REVERSEweakly similar to ( 124) GAM1_ORYSA Transcription factor GAMYB (OsGAMyb) - Oryza sativa (Rice)weakly similar to ( 189) loc_os04g46384 12004.m101864 protein DUO1, putative seq=cds; coord=1:190313406..190314657:1; parent_gene=GRMZM2G046443'	0	0	0	0	0	0	0	0	0	0	0	0	4
GRMZM2G070523	zma_MIR159abfk; zma_MIR159cd; zma_MIR159e	'moderately similar to ( 205) AT2G32460 | Symbols: MYB101, ATMYB101, ATM1 | MYB101; DNA binding / transcription factor | chr2:13782419-13784359 REVERSEmoderately similar to ( 205) GAM1_ORYSA Transcription factor GAMYB (OsGAMyb) - Oryza sativa (Rice)moderately similar to ( 332) loc_os03g38210 12003.m08921 protein myb-like DNA-binding domain containing protein, expressed seq=cds; coord=5:20197754..…	0	0	0	0	0.05	0.05	0.05	0.05	0	0.05	0	0	0
GRMZM2G075064	zma-MIR159abfjk; zma-MIR159cd; zma-MIR159hi; zma-MIR159g	'weakly similar to ( 110) AT3G11440 | Symbols: ATMYB65, MYB65 | MYB65 (MYB DOMAIN PROTEIN 65); DNA binding / transcription factor | chr3:3603056-3604929 FORWARDweakly similar to ( 118) GAM1_ORYSA Transcription factor GAMYB (OsGAMyb) - Oryza sativa (Rice)weakly similar to ( 165) loc_os06g40330 12006.m08569 protein myb-like DNA-binding domain containing protein, expressed seq=cds; coord=6:102317765…	0	0	0	0	0	0	0	0	0	0	0	0	2.5	5.75	11.25	8.5	8.5	1
GRMZM2G093789	zma-MIR159abfjk; zma-MIR159g; zma-MIR159hi	'weakly similar to ( 170) AT2G26960 | Symbols: AtMYB81 | AtMYB81 (myb domain protein 81); DNA binding / transcription factor | chr2:11506065-11507425 REVERSEweakly similar to ( 176) GAM1_ORYSA Transcription factor GAMYB (OsGAMyb) - Oryza sativa (Rice)moderately similar to ( 216) loc_os06g40330 12006.m08569 protein myb-like DNA-binding domain containing protein, expressed seq=cds; coord=6:89240861…	19.05	15.2	17.15	15.9	9.85	12.9	9.3	10.85	11.05	9.25	9.2	8.75	2.5	5.75	11.25	8.5	8.5	1
GRMZM2G105137	zma_MIR159abfjk	'moderately similar to ( 202) AT3G60460 | Symbols: DUO1 | DUO1 (DUO POLLEN 1); DNA binding / transcription factor | chr3:22342429-22343491 REVERSEweakly similar to ( 133) GAM1_ORYSA Transcription factor GAMYB (OsGAMyb) - Oryza sativa (Rice)moderately similar to ( 323) loc_os04g46384 12004.m101864 protein DUO1, putative seq=cds; coord=2:20122023..20123440:-1; parent_gene=GRMZM2G105137'	0	0	0	0	0	0	0	0	0	0	0	0	4.5
GRMZM2G139688	zma-MIR159abfjk; zma-MIR159hi; zma-MIR159cd; zma-MIR159g; zma-MIR159e; zma-MIR319abcd	'moderately similar to ( 263) AT3G11440 | Symbols: ATMYB65, MYB65 | MYB65 (MYB DOMAIN PROTEIN 65); DNA binding / transcription factor | chr3:3603056-3604929 FORWARDhighly similar to ( 875) GAM1_ORYSA Transcription factor GAMYB (OsGAMyb) - Oryza sativa (Rice)highly similar to ( 875) loc_os01g59660 12001.m42740 protein transcription factor GAMYB, putative, expressed seq=cds; coord=3:187002242..1870…	8.3	9.55	7	24.8	5.4	2.55	1.65	1.55	0.7	1.65	1.05	1.55	3.5	103.75	66.75	85.25	85.5	0.997
GRMZM2G158700	zma_MIR159g; zma_MIR159hi	'moderately similar to ( 219) AT5G49620 | Symbols: AtMYB78 | AtMYB78 (myb domain protein 78); DNA binding / transcription factor | chr5:20137491-20139384 REVERSEweakly similar to ( 149) MYBA2_ORYSA Myb-related protein MYBAS2 - Oryza sativa (Rice)moderately similar to ( 291) loc_os01g19330 12001.m08470 protein cpm7, putative, expressed seq=cds; coord=3:52308965..52309876:1; parent_gene=GRMZM2G1587…	0	0	0	0	0	0.1	0	0	0	0	0	0	4.5
GRMZM2G161512	zma_MIR159e	'weakly similar to ( 181) AT3G11440 | Symbols: ATMYB65, MYB65 | MYB65 (MYB DOMAIN PROTEIN 65); DNA binding / transcription factor | chr3:3603056-3604929 FORWARDweakly similar to ( 181) GAM1_ORYSA Transcription factor GAMYB (OsGAMyb) - Oryza sativa (Rice)moderately similar to ( 360) loc_os06g46560 12006.m09182 protein expressed protein seq=cds; coord=5:41686328..41688450:1; parent_gene=GRMZM2G1615…	0	0	0	0	0	0	0	0	0	0	0	0	5
GRMZM2G167088	zma_MIR159abfjk; zma_MIR159cd; zma_MIR159e; zma_MIR159g; zma_MIR159hi	'weakly similar to ( 173) AT2G32460 | Symbols: MYB101, ATMYB101, ATM1 | MYB101; DNA binding / transcription factor | chr2:13782419-13784359 REVERSEweakly similar to ( 179) GAM1_ORYSA Transcription factor GAMYB (OsGAMyb) - Oryza sativa (Rice)moderately similar to ( 218) loc_os06g40330 12006.m08569 protein myb-like DNA-binding domain containing protein, expressed seq=cds; coord=9:90079570..90086572…	0	0	0	0	0	0	0	0	0	0	0	0	1.5
GRMZM2G311059	zma_MIR159abfjk; zma_MIR159cd	'weakly similar to ( 189) AT3G60460 | Symbols: DUO1 | DUO1 (DUO POLLEN 1); DNA binding / transcription factor | chr3:22342429-22343491 REVERSEweakly similar to ( 129) GAM1_ORYSA Transcription factor GAMYB (OsGAMyb) - Oryza sativa (Rice)weakly similar to ( 199) loc_os04g46384 12004.m101864 protein DUO1, putative seq=cds; coord=10:139838952..139839963:-1; parent_gene=GRMZM2G311059'	0	0	0	0	0	0	0	0	0	0	0.05	0	4
GRMZM2G376684	zma_MIR159abfk; zma_MIR159cd; zma_MIR159e; zma_MIR159i	'weakly similar to ( 122) AT2G26960 | Symbols: AtMYB81 | AtMYB81 (myb domain protein 81); DNA binding / transcription factor | chr2:11506065-11507425 REVERSEweakly similar to ( 127) GAM1_ORYSA Transcription factor GAMYB (OsGAMyb) - Oryza sativa (Rice)weakly similar to ( 186) loc_os06g40330 12006.m08569 protein myb-like DNA-binding domain containing protein, expressed seq=cds; coord=6:102313193..1…	0	0	0	0	0	0	0	0	0	0	0	0	3
GRMZM2G416652	zma_MIR159abfjk; zma_MIR159cd; zma_MIR159e; zma_MIR159g; zma_MIR159hi	'weakly similar to ( 173) AT2G32460 | Symbols: MYB101, ATMYB101, ATM1 | MYB101; DNA binding / transcription factor | chr2:13782419-13784359 REVERSEweakly similar to ( 179) GAM1_ORYSA Transcription factor GAMYB (OsGAMyb) - Oryza sativa (Rice)moderately similar to ( 218) loc_os06g40330 12006.m08569 protein myb-like DNA-binding domain containing protein, expressed seq=cds; coord=9:90038338..90047250…	0.05	0.05	0	0.05	0.05	0	0	0	0	0	0.05	0.05	1.5
GRMZM2G423833	zma-MIR159abfjk; zma-MIR159cd; zma-MIR159g; zma-MIR159hi	'weakly similar to ( 172) AT5G06100 | Symbols: MYB33, ATMYB33 | MYB33 (MYB DOMAIN PROTEIN 33); DNA binding / transcription factor | chr5:1838555-1840386 FORWARDweakly similar to ( 183) GAM1_ORYSA Transcription factor GAMYB (OsGAMyb) - Oryza sativa (Rice)moderately similar to ( 233) loc_os06g40330 12006.m08569 protein myb-like DNA-binding domain containing protein, expressed seq=cds; coord=6:89138…	7.75	8.45	5.9	12.85	4.25	6.45	3.25	2.9	5.55	4.65	3.1	2.95	2	5.75	11.25	8.5	8.5	1
AC207656.3_FG002	zma-MIR160abcdg; zma-MIR160f	'highly similar to ( 635) AT4G30080 | Symbols: ARF16 | ARF16 (AUXIN RESPONSE FACTOR 16); miRNA binding / transcription factor | chr4:14703369-14705564 REVERSEhighly similar to ( 956) loc_os06g47150 12006.m091768 protein auxin response factor 16, putative, expressed seq=cds; coord=5:49253260..49255662:1; parent_gene=AC207656.3_FG002'	0.2	0.45	0.15	0.3	0.15	0.15	0.1	0.05	0.05	0.6	0	0	1	238.5	188	213.25	221.5	0.963
GRMZM2G005284	zma_MIR160abcdg; zma_MIR160f	'moderately similar to ( 332) AT2G28350 | Symbols: ARF10 | ARF10 (AUXIN RESPONSE FACTOR 10); miRNA binding / transcription factor | chr2:12114331-12116665 FORWARDmoderately similar to ( 429) loc_os02g41800 12002.m100286 protein auxin response factor 16, putative, expressed seq=cds; coord=10:130962665..130965090:-1; parent_gene=GRMZM2G005284'	0	0	0	0	0.05	0	0.1	0.15	0.25	0.35	0.1	0.05	1
GRMZM2G081406	zma-MIR160abcdg; zma-MIR160f	'highly similar to ( 512) AT4G30080 | Symbols: ARF16 | ARF16 (AUXIN RESPONSE FACTOR 16); miRNA binding / transcription factor | chr4:14703369-14705564 REVERSEhighly similar to ( 836) loc_os02g41800 12002.m100286 protein auxin response factor 16, putative, expressed seq=cds; coord=4:143802561..143805351:1; parent_gene=GRMZM2G081406'	20.25	17.9	21.7	15.05	10.45	9.65	8.5	16.35	31.1	15.9	23.05	11.1	2	1610	1891.5	1750.75	1753	0.999
GRMZM2G153233	zma-MIR160abcdg; zma-MIR160f	'moderately similar to ( 442) AT2G28350 | Symbols: ARF10 | ARF10 (AUXIN RESPONSE FACTOR 10); miRNA binding / transcription factor | chr2:12114331-12116665 FORWARDhighly similar to ( 563) loc_os10g33940 12010.m06222 protein auxin response factor 16, putative, expressed seq=cds; coord=1:230720011..230721599:-1; parent_gene=GRMZM2G153233'	36.6	56.9	23.4	68.3	19.45	34.25	25.85	30.7	28.55	19.3	29.05	25.1	1	245.5	324	284.75	291.75	0.976
GRMZM2G159399	zma-MIR160abcdg; zma-MIR160f	'highly similar to ( 664) AT4G30080 | Symbols: ARF16 | ARF16 (AUXIN RESPONSE FACTOR 16); miRNA binding / transcription factor | chr4:14703369-14705564 REVERSEhighly similar to ( 977) loc_os10g33940 12010.m06222 protein auxin response factor 16, putative, expressed seq=cds; coord=5:27944757..27949513:-1; parent_gene=GRMZM2G159399'	48.1	65.85	32.3	75.45	22.6	27.5	37.9	43.85	43.65	31.45	56.25	71.05	1	226.75	152.25	189.5	194.25	0.976
GRMZM2G390641	zma-MIR160abcdg; zma-MIR160f	'highly similar to ( 606) AT4G30080 | Symbols: ARF16 | ARF16 (AUXIN RESPONSE FACTOR 16); miRNA binding / transcription factor | chr4:14703369-14705564 REVERSEhighly similar to ( 921) loc_os06g47150 12006.m091768 protein auxin response factor 16, putative, expressed seq=cds; coord=6:89122198..89125399:-1; parent_gene=GRMZM2G390641'	1.3	1.55	1.3	2.15	0.5	0.65	0.6	0.95	0.85	5.85	0.4	3.85	1	1739.5	1782.5	1761	1766.25	0.997
GRMZM5G808366	zma-MIR160abcdg; zma-MIR160f	'moderately similar to ( 278) AT1G77850 | Symbols: ARF17 | ARF17 (AUXIN RESPONSE FACTOR 17); transcription factor | chr1:29272405-29275193 FORWARDmoderately similar to ( 391) loc_os04g59430 12004.m10819 protein B3 DNA binding domain containing protein, expressed seq=cds; coord=2:25424201..25429000:-1; parent_gene=GRMZM5G808366'	39.85	17.4	33.7	69.05	2.2	3.2	0.75	2.7	2.75	0.05	2.5	1.2	1.5	29	24.5	26.75	27.5	0.973
GRMZM2G040762	zma-MIR162	'nearly identical (2003) AT1G01040 | Symbols: DCL1, CAF, SUS1, SIN1, ASU1, EMB76, EMB60, ATDCL1 | DCL1 (DICER-LIKE 1); ATP-dependent helicase/ double-stranded RNA binding / protein binding / ribonuclease III | chr1:23519-31079 FORWARDnearly identical (2399) loc_os03g02970 12003.m05835 protein endoribonuclease Dicer, putative, expressed seq=cds; coord=1:4607185..4614592:-1; parent_gene=GRMZM2G0407…	47.7	41.5	53.95	27.55	66.3	83.95	61.8	55.65	39.4	21.1	43.25	80.85	2	6	6	6	7.25	0.828
GRMZM2G063522	zma_MIR164abcdg; zma_MIR164e; zma_MIR164f; zma_MIR164h	'moderately similar to ( 261) AT1G56010 | Symbols: NAC1, ANAC022 | NAC1; transcription factor | chr1:20946852-20949144 REVERSEweakly similar to ( 182) NAC77_ORYSA NAC domain-containing protein 77 (ONAC077) (ONAC300) - Oryza sativa (Rice)moderately similar to ( 448) loc_os06g46270 12006.m09153 protein NAC domain-containing protein 21/22, putative, expressed seq=cds; coord=5:43417416..43421787:-1; …	0	0	0	0	0	0	0	0	0	0	0	0	1
GRMZM2G114850	zma-MIR164abcdg; zma-MIR164e; zma-MIR164f; zma-MIR164h	'moderately similar to ( 218) AT1G56010 | Symbols: NAC1, ANAC022 | NAC1; transcription factor | chr1:20946852-20949144 REVERSEweakly similar to ( 183) NAC77_ORYSA NAC domain-containing protein 77 (ONAC077) (ONAC300) - Oryza sativa (Rice)moderately similar to ( 369) loc_os12g41680 12012.m07949 protein NAC domain-containing protein 21/22, putative, expressed seq=cds; coord=3:122071793..122076122:1;…	1.8	0.25	2.55	0.15	1.3	1.55	0.7	2.6	2.4	0.5	0.4	0.45	2	3.25	8.75	6	6	1
GRMZM2G139700	zma-MIR164abcdg; zma-MIR164e; zma-MIR164f; zma-MIR164h	'moderately similar to ( 266) AT5G53950 | Symbols: CUC2, ANAC098 | CUC2 (CUP-SHAPED COTYLEDON 2); transcription factor | chr5:21901966-21903795 REVERSEweakly similar to ( 198) NAC77_ORYSA NAC domain-containing protein 77 (ONAC077) (ONAC300) - Oryza sativa (Rice)moderately similar to ( 380) loc_os06g23650 12006.m07017 protein CUC2, putative, expressed seq=cds; coord=3:137579039..137580848:1; paren…	14.1	17.15	13.5	29.7	4.5	11.15	0.4	0.35	0.2	0.25	0.95	0.1	2	7.75	5.25	6.5	6.75	0.963
GRMZM2G393433	zma-MIR164abcdg; zma-MIR164e; zma-MIR164f; zma-MIR164h	'moderately similar to ( 258) AT5G53950 | Symbols: CUC2, ANAC098 | CUC2 (CUP-SHAPED COTYLEDON 2); transcription factor | chr5:21901966-21903795 REVERSEweakly similar to ( 194) NAC77_ORYSA NAC domain-containing protein 77 (ONAC077) (ONAC300) - Oryza sativa (Rice)moderately similar to ( 357) loc_os06g23650 12006.m07017 protein CUC2, putative, expressed seq=cds; coord=6:16291162..16293314:-1; parent…	265.8	345.1	149.45	315.5	71.8	166.15	11.15	5.8	4.5	4.9	15.8	1.1	2	32.5	37	34.75	36	0.965
AC187157.4_FG005	zma_MIR166abcdghi; zma_MIR166jnk; zma_MIR166ml	'nearly identical (1076) AT1G52150 | Symbols: ATHB-15, ATHB15, CNA, ICU4 | ATHB-15; DNA binding / transcription factor | chr1:19410118-19413961 REVERSEhighly similar to ( 992) loc_os03g43930 12003.m09434 protein class III HD-Zip protein 4, putative, expressed seq=cds; coord=8:22640866..22645283:-1; parent_gene=AC187157.4_FG005'	0	0.3	0.15	0	0.35	0.05	0.85	0.85	0.5	2.2	0.3	0.4	2.5
GRMZM2G003509	zma-MIR166abcdghi; zma-MIR166jkn; zma-MIR166lm	'nearly identical (1131) AT2G34710 | Symbols: PHB, ATHB14, ATHB-14, PHB-1D | PHB (PHABULOSA); DNA binding / transcription factor | chr2:14639548-14643993 REVERSEnearly identical (1403) loc_os12g41860 12012.m07967 protein class III HD-Zip protein 4, putative, expressed seq=cds; coord=1:173233037..173239064:-1; parent_gene=GRMZM2G003509'	84.85	108.8	69.65	225.25	109.5	34.7	37.75	25.9	29.75	50.65	41.8	24.15	2	52.75	31.25	42	47.75	0.88
GRMZM2G029692	zma_MIR166jnk;	'very weakly similar to (84.7) loc_os12g41860 12012.m07967 protein class III HD-Zip protein 4, putative, expressed seq=cds; coord=7:6142721..6143051:-1; parent_gene=GRMZM2G029692'	12.5	26.1	6.75	25.45	7.4	8	2.15	1.65	3.05	15.25	3.75	1.1	4.5
GRMZM2G042250	zma-MIR166abcdghi; zma-MIR166jkn; zma-MIR166lm	'nearly identical (1154) AT5G60690 | Symbols: REV, IFL, IFL1 | REV (REVOLUTA); DNA binding / lipid binding / transcription factor | chr5:24397734-24401933 FORWARDnearly identical (1520) loc_os03g01890 12003.m34764 protein rolled leaf1, putative, expressed seq=cds; coord=1:2793950..2800638:1; parent_gene=GRMZM2G042250'	182.7	239.7	187.6	392.6	206.65	144.25	122.3	113.25	131.95	355.75	226.95	95.6	2	276.75	234.25	255.5	258.75	0.987
GRMZM2G066341	zma-MIR166abcdghi; zma-MIR166jkn	'weakly similar to ( 187) loc_os05g08800 12005.m05394 protein expressed protein seq=cds; coord=6:130839008..130840986:-1; parent_gene=GRMZM2G066341'	126.55	108.35	153.9	114.05	120.9	120.9	83.6	95.4	109.8	53.6	120.15	120.1	5	18	16.5	17.25	19	0.908
GRMZM2G109987	zma-MIR166abcdghi; zma-MIR166jkn; zma-MIR166lm	'nearly identical (1001) AT5G60690 | Symbols: REV, IFL, IFL1 | REV (REVOLUTA); DNA binding / lipid binding / transcription factor | chr5:24397734-24401933 FORWARDnearly identical (1296) loc_os03g01890 12003.m34764 protein rolled leaf1, putative, expressed seq=cds; coord=9:154642336..154650601:-1; parent_gene=GRMZM2G109987'	223.67	199.8	245.81	173.39	304.35	301.47	260.41	252.81	262.35	201.22	352.84	265.3	2	276	211.5	243.75	249.25	0.978
GRMZM2G178102	zma-MIR166abcdghi; zma-MIR166jkn; zma-MIR166lm	'nearly identical (1162) AT2G34710 | Symbols: PHB, ATHB14, ATHB-14, PHB-1D | PHB (PHABULOSA); DNA binding / transcription factor | chr2:14639548-14643993 REVERSEnearly identical (1449) loc_os12g41860 12012.m07967 protein class III HD-Zip protein 4, putative, expressed seq=cds; coord=3:123263423..123270240:-1; parent_gene=GRMZM2G178102'	200.95	281.55	176.2	387.55	228.95	99.45	81.6	107.55	88.6	254.35	105.4	52.3	2	52.5	31.5	42	47.75	0.88
GRMZM2G469551	zma-MIR166abcdghi; zma-MIR166jkn; zma-MIR166lm	'highly similar to ( 865) AT5G60690 | Symbols: REV, IFL, IFL1 | REV (REVOLUTA); DNA binding / lipid binding / transcription factor | chr5:24397734-24401933 FORWARDnearly identical (1055) loc_os10g33960 12010.m065291 protein HB1, putative, expressed seq=cds; coord=1:230535887..230547084:-1; parent_gene=GRMZM2G469551'	50.25	66.55	59.6	43.8	99.75	58.75	85.9	83.75	65.3	82	125.65	52.55	2	27.5	61.5	44.5	47	0.947
GRMZM2G028980	zma_MIR167abcd; zma_MIR167efghi	'weakly similar to ( 103) loc_os02g06910 12002.m06038 protein auxin response factor 6, putative, expressed seq=cds; coord=4:236476469..236478195:-1; parent_gene=GRMZM2G028980'	63.5	48	62.55	58.45	41	77.35	35.9	46.5	51.7	80.85	47.45	34.4	5
GRMZM2G035405	zma-MIR167abcd; zma-MIR167efghi	'moderately similar to ( 303) AT1G30330 | Symbols: ARF6 | ARF6 (AUXIN RESPONSE FACTOR 6); transcription factor | chr1:10686125-10690036 REVERSEhighly similar to ( 690) loc_os06g46410 12006.m091759 protein auxin response factor 6, putative, expressed seq=cds; coord=5:42299881..42304178:1; parent_gene=GRMZM2G035405'	49	132	39.3	60.7	76.8	261.05	51.2	41.75	52.05	112.65	57.95	63.2	5	145.5	92.5	119	165.75	0.718
GRMZM2G073750	zma_MIR167abcd; zma_MIR167efghi	'highly similar to ( 741) AT1G30330 | Symbols: ARF6 | ARF6 (AUXIN RESPONSE FACTOR 6); transcription factor | chr1:10686125-10690036 REVERSEhighly similar to ( 858) loc_os12g41950 12012.m07976 protein auxin response factor 6, putative, expressed seq=cds; coord=3:123862422..123868621:-1; parent_gene=GRMZM2G073750'	37.7	57.6	41.75	74.15	22.95	34.1	14.6	16.7	19.8	76.15	21.05	19.35	5
GRMZM2G078274	zma-MIR167abcd; zma-MIR167efghi	'highly similar to ( 687) AT5G37020 | Symbols: ARF8 | ARF8 (AUXIN RESPONSE FACTOR 8); transcription factor | chr5:14630151-14633916 FORWARDnearly identical (1283) loc_os04g57610 12004.m35224 protein auxin response factor 8, putative, expressed seq=cds; coord=2:2266715..2274671:1; parent_gene=GRMZM2G078274'	88	189.65	121.55	162.55	100.1	247.15	122.65	130.1	146	411.9	127.8	150.45	4	223	139	181	228.25	0.793
GRMZM2G081158	zma-MIR167abcd; zma-MIR167efghi	'very weakly similar to (81.3) AT1G30330 | Symbols: ARF6 | ARF6 (AUXIN RESPONSE FACTOR 6); transcription factor | chr1:10686125-10690036 REVERSEvery weakly similar to (87.4) loc_os12g41950 12012.m07976 protein auxin response factor 6, putative, expressed seq=cds; coord=1:173421803..173423230:-1; parent_gene=GRMZM2G081158'	45.9	57.35	48	47.65	33.25	87.2	17.4	14.15	19.45	110.85	18.45	20.35	5	145.5	92.5	119	143.75	0.828
GRMZM2G089640	zma-MIR167abcd; zma-MIR167efghi	'moderately similar to ( 381) AT1G30330 | Symbols: ARF6 | ARF6 (AUXIN RESPONSE FACTOR 6); transcription factor | chr1:10686125-10690036 REVERSEhighly similar to ( 891) loc_os06g46410 12006.m091759 protein auxin response factor 6, putative, expressed seq=cds; coord=6:91321754..91324708:1; parent_gene=GRMZM2G089640'	0.4	0.8	0.4	1.05	0.7	0.99	0.5	0.45	0.3	1.35	0.4	0.45	5	145.5	92.5	119	147.25	0.808
GRMZM2G475882	zma-MIR167abcd; zma-MIR167efghi	'highly similar to ( 551) AT1G30330 | Symbols: ARF6 | ARF6 (AUXIN RESPONSE FACTOR 6); transcription factor | chr1:10686125-10690036 REVERSEnearly identical (1217) loc_os04g57610 12004.m35224 protein auxin response factor 8, putative, expressed seq=cds; coord=10:147719221..147728103:-1; parent_gene=GRMZM2G475882'	17.55	44.5	23.45	31.6	13.15	16.8	12.25	10.1	12.85	65.8	15.3	29.8	4	223	139	181	228.25	0.793
AC199001.3_FG005	zma-MIR168ab	'moderately similar to ( 308) AT1G48410 | Symbols: AGO1 | AGO1 (ARGONAUTE 1); endoribonuclease/ miRNA binding / protein binding / siRNA binding | chr1:17886285-17891892 REVERSEmoderately similar to ( 396) loc_os04g47870 12004.m09728 protein PINHEAD protein, putative, expressed seq=cds; coord=8:134902882..134904730:1; parent_gene=AC199001.3_FG005'	0	0	0.05	0.05	0.2	0.2	0.2	0.05	0	0.35	0.05	0.2	5	46.5	36	41.25	43.75	0.943
GRMZM2G039455	zma-MIR168ab	ago1a 'nearly identical (1445) AT1G48410 | Symbols: AGO1 | AGO1 (ARGONAUTE 1); endoribonuclease/ miRNA binding / protein binding / siRNA binding | chr1:17886285-17891892 REVERSEnearly identical (1738) loc_os04g47870 12004.m09728 protein PINHEAD protein, putative, expressed seq=cds; coord=2:16938974..16948829:1; parent_gene=GRMZM2G039455'	286.85	367.9	247.4	110.25	881.65	489.55	680.55	622.6	610.6	297.95	472.55	555.25	5	52	18	35	36	0.972
GRMZM2G361518	zma_MIR168ab	'nearly identical (1310) AT1G48410 | Symbols: AGO1 | AGO1 (ARGONAUTE 1); endoribonuclease/ miRNA binding / protein binding / siRNA binding | chr1:17886285-17891892 REVERSEnearly identical (1617) loc_os06g51310 12006.m091803 protein PINHEAD protein, putative, expressed seq=cds; coord=5:64763204..64768932:1; parent_gene=GRMZM2G361518'	2.3	2.5	4.25	0.75	0.6	0.9	0.7	1.1	0.55	2.5	0.75	2.1	5
GRMZM2G441583	zma-MIR168ab	ago1c 'nearly identical (1387) AT1G48410 | Symbols: AGO1 | AGO1 (ARGONAUTE 1); endoribonuclease/ miRNA binding / protein binding / siRNA binding | chr1:17886285-17891892 REVERSEnearly identical (1584) loc_os04g47870 12004.m09728 protein PINHEAD protein, putative, expressed seq=cds; coord=6:43093883..43102333:1; parent_gene=GRMZM2G441583'	215.9	160.8	191.65	202.85	127.6	165.05	94.65	83.9	85.9	112.35	98.45	95.55	5	46.5	36	41.25	43.75	0.943
GRMZM2G000686	zma-MIR169ab; zma-MIR169cr; zma-MIR169fh; zma-MIR169ijk; zma-MIR169h; zma-MIR169p	'weakly similar to ( 147) AT3G14020 | Symbols: NF-YA6 | NF-YA6 (NUCLEAR FACTOR Y, SUBUNIT A6); transcription factor | chr3:4642968-4644301 FORWARDmoderately similar to ( 285) loc_os03g07880 12003.m35594 protein nuclear transcription factor Y subunit A-3, putative, expressed seq=cds; coord=1:15806192..15809456:-1; parent_gene=GRMZM2G000686'	55.6	46.25	51	29.05	38.7	55.4	26.75	43.9	48.9	27.6	35.7	38.95	3.5	514.25	414.75	464.5	483.5	0.961
GRMZM2G037630	zma-MIR169ab; zma-MIR169cr; zma-MIR169fh; zma-MIR169ijk; zma-MIR169l; zma-MIR169p	'weakly similar to ( 114) AT3G14020 | Symbols: NF-YA6 | NF-YA6 (NUCLEAR FACTOR Y, SUBUNIT A6); transcription factor | chr3:4642968-4644301 FORWARDweakly similar to ( 137) loc_os07g41720 12007.m29255 protein nuclear transcription factor Y subunit A-3, putative, expressed seq=cds; coord=1:71580688..71587233:1; parent_gene=GRMZM2G037630'	11.35	14.2	10.65	6.35	17.25	15.75	13.4	10.05	20.75	13.15	13.45	14.55	3.5	60.5	40	50.25	51.5	0.976
GRMZM2G038303	zma-MIR169ab; zma-MIR169cr; zma-MIR169fh; zma-MIR169ijk; zma-MIR169l; zma-MIR169p	'weakly similar to ( 132) AT1G72830 | Symbols: HAP2C, ATHAP2C, NF-YA3 | NF-YA3 (NUCLEAR FACTOR Y, SUBUNIT A3); transcription factor | chr1:27405699-27407088 REVERSEmoderately similar to ( 281) loc_os07g41720 12007.m29255 protein nuclear transcription factor Y subunit A-3, putative, expressed seq=cds; coord=7:164991494..164995805:-1; parent_gene=GRMZM2G038303'	4.35	11.1	2	3.95	3.4	4.45	3.2	3.45	9.3	1.25	10.45	13.15	3.5	14.5	11.5	13	16.5	0.788
GRMZM2G040349	zma-MIR169ab; zma-MIR169cr; zma-MIR169fh; zma-MIR169ijk; zma-MIR169l; zma-MIR169p	'weakly similar to ( 130) AT1G72830 | Symbols: HAP2C, ATHAP2C, NF-YA3 | NF-YA3 (NUCLEAR FACTOR Y, SUBUNIT A3); transcription factor | chr1:27405699-27407088 REVERSEmoderately similar to ( 287) loc_os07g41720 12007.m29255 protein nuclear transcription factor Y subunit A-3, putative, expressed seq=cds; coord=2:210788762..210792895:-1; parent_gene=GRMZM2G040349'	79.85	79.75	59.65	53.65	34.1	48.4	33.55	31.45	65.9	34.65	48.85	45.4	3.5	307.75	277.25	292.5	307.5	0.951
GRMZM2G091964	zma-MIR169ab; zma-MIR169cr; zma-MIR169fh; zma-MIR169ijk; zma-MIR169l; zma-MIR169mnq; zma-MIR169o; zma-MIR169p	'weakly similar to ( 121) AT1G30500 | Symbols: NF-YA7 | NF-YA7 (NUCLEAR FACTOR Y, SUBUNIT A7); specific transcriptional repressor/ transcription factor | chr1:10804736-10805896 REVERSEmoderately similar to ( 254) loc_os03g48970 12003.m101451 protein nuclear transcription factor Y subunit A-1, putative, expressed seq=cds; coord=1:263440463..263447926:1; parent_gene=GRMZM2G091964'	23.25	19.35	19.9	26.15	12.5	17.85	10.05	11.6	12.5	7.45	17.05	13.25	4	2621	2142.5	2381.75	2418	0.985
GRMZM2G165488	zma-MIR169ab; zma-MIR169cr; zma-MIR169fh; zma-MIR169ijk; zma-MIR169l; zma-MIR169mnq; zma-MIR169o; zma-MIR169p	'weakly similar to ( 197) loc_os03g44540 12003.m09492 protein nuclear transcription factor Y subunit A-10, putative, expressed seq=cds; coord=5:16461402..16465291:1; parent_gene=GRMZM2G165488'	25.35	20.45	25.3	21	12.55	13.9	18.7	24.05	28.65	18.85	21.8	16.35	3	1021.5	922.5	972	992.25	0.98
GRMZM5G829103	zma-MIR169ab; zma-MIR169cr; zma-MIR169fh; zma-MIR169ijk; zma-MIR169l; zma-MIR169mnq; zma-MIR169o; zma-MIR169p	'weakly similar to ( 103) loc_os03g44540 12003.m09492 protein nuclear transcription factor Y subunit A-10, putative, expressed seq=cds; coord=1:250317354..250321412:1; parent_gene=GRMZM5G829103'	2.35	5.9	3.2	2.35	2.7	0.95	6.8	9.5	11.4	6.9	10.45	7.3	3	1164.75	869.75	1017.25	1044.25	0.974
GRMZM5G853836	zma-MIR169ab; zma-MIR169cr; zma-MIR169fh; zma-MIR169ijk; zma-MIR169l; zma-MIR169mnq; zma-MIR169o; zma-MIR169p	'weakly similar to ( 104) loc_os12g42400 12012.m073889 protein nuclear transcription factor Y subunit A-2, putative, expressed seq=cds; coord=1:174849822..174850967:1; parent_gene=GRMZM5G853836'	39.6	31.55	43.15	26.2	21.7	22.2	15.2	19.5	19.8	19.45	15.8	23.3	3	1290.75	1162.75	1226.75	1243	0.987
GRMZM5G857944	zma-MIR169ab; zma-MIR169cr; zma-MIR169fh; zma-MIR169ijk; zma-MIR169l; zma-MIR169p	'very weakly similar to (96.3) loc_os02g53620 12002.m10391 protein nuclear transcription factor Y subunit A-3, putative, expressed seq=cds; coord=5:211666408..211670851:-1; parent_gene=GRMZM5G857944'	23.35	18.15	12.85	42.35	1.15	5.2	0.55	1.15	3.05	1.6	0.7	1	3	17.75	7.75	12.75	13	0.981
GRMZM2G011947	zma-MIR171b; zma-MIR171f	weakly similar to ( 123) AT4G00150 | Symbols: | scarecrow-like transcription factor 6 (SCL6) | chr4:57429-59105 REVERSEmoderately similar to ( 231) loc_os10g40390 12010.m06807 protein scarecrow-like 6, putative seq=cds; coord=6:55396619..55397567:1; parent_gene=GRMZM2G011947'	0	0	0	0	0	0	0	0	0	0	0	0	2	50.25	175.25	112.75	119.75	0.942
GRMZM2G037792	zma-MIR171a; zma-MIR171deij; zma-MIR171c	'moderately similar to ( 275) AT4G00150 | Symbols: | scarecrow-like transcription factor 6 (SCL6) | chr4:57429-59105 REVERSEweakly similar to ( 104) NSP2_MEDTR Nodulation signaling pathway 2 protein - Medicago truncatula (Barrel medic)highly similar to ( 736) loc_os04g46860 12004.m09634 protein scarecrow-like 6, putative, expressed seq=cds; coord=10:138692673..138695382:-1; parent_gene=GRMZM2G037…	53.8	42.75	55.5	55.7	38.65	35.15	37.6	36.75	36.8	43.45	31.95	28.9	0	393.75	570.75	482.25	620.75	0.777
GRMZM2G051785	zma-MIR171a; zma-MIR171deij; zma-MIR171c	'moderately similar to ( 222) AT4G00150 | Symbols: | scarecrow-like transcription factor 6 (SCL6) | chr4:57429-59105 REVERSEweakly similar to ( 102) GAIP_CUCMA DELLA protein GAIP (Gibberellic acid-insensitive phloem protein) (GAIP) (CmGAIP) - Cucurbita maxima (Pumpkin) (Winter squash)moderately similar to ( 418) loc_os06g01620 12006.m04899 protein scarecrow-like 6, putative, expressed seq=cds; co…	6.9	9.1	6.85	10.25	1.3	6.95	0.7	0.85	0.75	2.35	0.4	0.95	0	6.5	11.5	9	12.75	0.706
GRMZM2G060265	zma_MIR171a; zma_MIR171b; zma_MIR171deij; zma_MIR171f	'moderately similar to ( 238) AT4G00150 | Symbols: | scarecrow-like transcription factor 6 (SCL6) | chr4:57429-59105 REVERSEvery weakly similar to (93.6) NSP2_MEDTR Nodulation signaling pathway 2 protein - Medicago truncatula (Barrel medic)moderately similar to ( 421) loc_os10g40390 12010.m06807 protein scarecrow-like 6, putative seq=cds; coord=1:1955584..1957660:1; parent_gene=GRMZM2G060265'	0	0.4	0.15	0.15	0	0	0	0.05	0.05	3.45	0.55	0	3
GRMZM2G079470	zma-MIR171b; zma-MIR171f	'moderately similar to ( 249) AT4G00150 | Symbols: | scarecrow-like transcription factor 6 (SCL6) | chr4:57429-59105 REVERSEvery weakly similar to (92.0) GAIP_CUCMA DELLA protein GAIP (Gibberellic acid-insensitive phloem protein) (GAIP) (CmGAIP) - Cucurbita maxima (Pumpkin) (Winter squash)moderately similar to ( 456) loc_os10g40390 12010.m06807 protein scarecrow-like 6, putative seq=cds; coord=1:…	46.5	19.45	63.75	18.2	34.45	21.4	19.6	29.1	33	60.1	15.05	10.75	2	50.25	175.25	112.75	119.75	0.942
GRMZM2G098800	zma-MIR171a; zma-MIR171deij; zma-MIR171c	'moderately similar to ( 241) AT4G00150 | Symbols: | scarecrow-like transcription factor 6 (SCL6) | chr4:57429-59105 REVERSEvery weakly similar to (97.8) NSP2_MEDTR Nodulation signaling pathway 2 protein - Medicago truncatula (Barrel medic)highly similar to ( 801) loc_os02g44370 12002.m09477 protein nodulation signaling pathway 2 protein, putative, expressed seq=cds; coord=4:153196404..153199186:…	57.05	26.6	70.4	37.2	30.05	60.45	26.55	34.3	33.4	33.25	33.1	31.9	0	191.5	183	187.25	286.5	0.654
GRMZM2G110579	zma-MIR171a; zma-MIR171deij; zma-MIR171c	'moderately similar to ( 245) AT4G00150 | Symbols: | scarecrow-like transcription factor 6 (SCL6) | chr4:57429-59105 REVERSEvery weakly similar to (81.3) NSP2_MEDTR Nodulation signaling pathway 2 protein - Medicago truncatula (Barrel medic)highly similar to ( 766) loc_os02g44370 12002.m09477 protein nodulation signaling pathway 2 protein, putative, expressed seq=cds; coord=5:192846362..192849106:…	44.95	17.8	57.15	25.7	17.8	34.65	16.5	19.9	19.1	33.05	15.85	14.35	0	191	183	187	286.5	0.653
GRMZM2G418899	zma-MIR171a; zma-MIR171deij; zma-MIR171c	'weakly similar to ( 196) AT4G00150 | Symbols: | scarecrow-like transcription factor 6 (SCL6) | chr4:57429-59105 REVERSEmoderately similar to ( 451) loc_os04g46860 12004.m09634 protein scarecrow-like 6, putative, expressed seq=cds; coord=7:162812674..162823322:-1; parent_gene=GRMZM2G418899'	0	0	0	0	0.1	0.05	0.05	0	0.05	0	0	0	0	393.75	570.75	482.25	620.5	0.777
GRMZM5G825321	zma-MIR171a; zma-MIR171deij; zma-MIR171c	moderately similar to ( 277) AT4G00150 | Symbols: | scarecrow-like transcription factor 6 (SCL6) | chr4:57429-59105 REVERSEweakly similar to ( 105) NSP2_MEDTR Nodulation signaling pathway 2 protein - Medicago truncatula (Barrel medic)highly similar to ( 738) loc_os04g46860 12004.m09634 protein scarecrow-like 6, putative, expressed seq=cds; coord=2:19145889..19148777:-1; parent_gene=GRMZM5G825321'	40.35	29.9	55.1	23.55	51.15	72.4	58.15	66.7	66.9	84.6	79.6	74.75	0	393.75	570.75	482.25	620	0.778
GRMZM2G076602	zma-MIR172abcd; zma-MIR172e	'weakly similar to ( 169) AT4G36920 | Symbols: AP2, FLO2, FL1 | AP2 (APETALA 2); transcription factor | chr4:17400998-17403140 FORWARDvery weakly similar to (80.9) BBM2_BRANA Protein BABY BOOM 2 (BnBBM2) - Brassica napus (Rape)moderately similar to ( 218) loc_os04g55560 12004.m35488 protein AP2 domain containing protein, expressed seq=cds; coord=10:145350317..145352828:1; parent_gene=GRMZM2G07660…	2.4	3.3	2.4	0.7	0.4	1.35	0.85	1.05	2.9	5.4	0.7	1.7	3	144.5	181.5	163	173	0.942
GRMZM2G160730	zma-MIR172abcd; zma-MIR172e	'moderately similar to ( 223) AT4G36920 | Symbols: AP2, FLO2, FL1 | AP2 (APETALA 2); transcription factor | chr4:17400998-17403140 FORWARDweakly similar to ( 127) BBM2_BRANA Protein BABY BOOM 2 (BnBBM2) - Brassica napus (Rape)moderately similar to ( 251) loc_os06g43220 12006.m08852 protein floral homeotic protein APETALA2, putative, expressed seq=cds; coord=9:95739338..95742681:1; parent_gene=GRM…	7.4	8.35	12.25	15.15	2.3	1.6	0.6	0.5	2.35	7.25	5.55	3.75	2	53.75	75.75	64.75	73.5	0.881
GRMZM2G174784	zma-MIR172abcd; zma-MIR172e	'moderately similar to ( 268) AT4G36920 | Symbols: AP2, FLO2, FL1 | AP2 (APETALA 2); transcription factor | chr4:17400998-17403140 FORWARDweakly similar to ( 130) BBM2_BRANA Protein BABY BOOM 2 (BnBBM2) - Brassica napus (Rape)moderately similar to ( 382) loc_os04g55560 12004.m35488 protein AP2 domain containing protein, expressed seq=cds; coord=2:5514479..5518846:-1; parent_gene=GRMZM2G174784'	10.5	18.5	12.1	6.5	12.35	24.9	16.05	21.45	35.95	47.25	26.8	34.6	3	77	86.5	81.75	88	0.929
GRMZM2G176175	zma-MIR172abcd; zma-MIR172e	'moderately similar to ( 261) AT4G36920 | Symbols: AP2, FLO2, FL1 | AP2 (APETALA 2); transcription factor | chr4:17400998-17403140 FORWARDweakly similar to ( 147) BBM2_BRANA Protein BABY BOOM 2 (BnBBM2) - Brassica napus (Rape)moderately similar to ( 499) loc_os07g13170 12007.m29109 protein floral homeotic protein, putative, expressed seq=cds; coord=7:22004372..22015553:1; parent_gene=GRMZM2G17617…	16.5	13.85	14.9	15.2	8.8	6.45	6.45	6.2	9.1	2.8	4.95	7.6	1	510.5	597.5	554	555.65	0.992
GRMZM2G700665	zma-MIR172abcd; zma-MIR172e	'moderately similar to ( 219) AT4G36920 | Symbols: AP2, FLO2, FL1 | AP2 (APETALA 2); transcription factor | chr4:17400998-17403140 FORWARDweakly similar to ( 118) BBM2_BRANA Protein BABY BOOM 2 (BnBBM2) - Brassica napus (Rape)moderately similar to ( 240) loc_os05g03040 12005.m27679 protein floral homeotic protein APETALA2, putative, expressed seq=cds; coord=8:132044001..132047428:1; parent_gene=G…	0.45	1.5	0.5	0.5	1	1.35	1.1	0.8	1.55	3.2	0.75	0.95	1	59.75	42.25	51	58	0.879
GRMZM5G862109	zma-MIR172abcd; zma-MIR172e	'moderately similar to ( 256) AT4G36920 | Symbols: AP2, FLO2, FL1 | AP2 (APETALA 2); transcription factor | chr4:17400998-17403140 FORWARDweakly similar to ( 131) BBM2_BRANA Protein BABY BOOM 2 (BnBBM2) - Brassica napus (Rape)moderately similar to ( 322) loc_os03g60430 12003.m10932 protein floral homeotic protein, putative, expressed seq=cds; coord=1:292889740..292893983:1; parent_gene=GRMZM5G862…	86.8	86.7	89.6	86.4	90.1	50.1	59.55	68.3	39.5	30.95	57.75	71.2	1	675.5	453.5	564.5	569.75	0.991
GRMZM5G879527	zma-MIR172abcd; zma-MIR172e	'weakly similar to ( 113) AT2G42280 | Symbols: | basic helix-loop-helix (bHLH) family protein | chr2:17611891-17613163 REVERSEmoderately similar to ( 267) loc_os08g39630 12008.m26738 protein DNA binding protein, putative, expressed seq=cds; coord=1:188031610..188034600:1; parent_gene=GRMZM5G879527'	2.85	2.35	4.65	1.6	1.65	0.75	1	4.1	5.1	21.4	1.65	1.45	4	59	59	59	68.5	0.861
AC205574.3_FG006	zma-MIR319abcd	'moderately similar to ( 209) AT3G15030 | Symbols: TCP4 | TCP4 (TCP family transcription factor 4); transcription factor | chr3:5062308-5063570 FORWARDmoderately similar to ( 427) loc_os01g11550 12001.m07772 protein mutant cincinnata, putative, expressed seq=cds; coord=3:3475915..3478576:1; parent_gene=AC205574.3_FG006'	0	0.15	0.1	0.05	0.1	0.1	0	0.05	0.15	0	0.1	0.2	4	64	81.5	72.75	76.25	0.954
GRMZM2G015037	zma-MIR319abcd	'weakly similar to ( 167) AT3G15030 | Symbols: TCP4 | TCP4 (TCP family transcription factor 4); transcription factor | chr3:5062308-5063570 FORWARDmoderately similar to ( 311) loc_os01g11550 12001.m07772 protein mutant cincinnata, putative, expressed seq=cds; coord=8:24473504..24475675:-1; parent_gene=GRMZM2G015037'	1.95	3.25	3.25	3.45	2.35	1.35	1.05	4.3	7.95	1.9	7.4	3	4	64	81.5	72.75	75.25	0.967
GRMZM2G020805	zma-MIR319abcd; zma-MIR159cd	'weakly similar to ( 130) AT1G30210 | Symbols: TCP24 | TCP24 (TEOSINTE BRANCHED1, CYCLOIDEA, AND PCF FAMILY 24); transcription factor | chr1:10628754-10629728 REVERSEmoderately similar to ( 224) loc_os07g05720 12007.m05036 protein TCP family transcription factor containing protein, expressed seq=cds; coord=2:234800716..234801982:-1; parent_gene=GRMZM2G020805'	3.75	11.1	6.25	10.05	8.75	5.5	12.9	18.55	23.5	9.1	30.55	23.1	4.5	59	48	53.5	55.25	0.968
GRMZM2G028054	zma-MIR319abcd; zma-MIR159abfjk; zma-MIR159cd; zma-MIR159hi; zma-MIR159g; zma-MIR159e	'moderately similar to ( 226) AT3G11440 | Symbols: ATMYB65, MYB65 | MYB65 (MYB DOMAIN PROTEIN 65); DNA binding / transcription factor | chr3:3603056-3604929 FORWARDhighly similar to ( 609) GAM1_ORYSA Transcription factor GAMYB (OsGAMyb) - Oryza sativa (Rice)highly similar to ( 609) loc_os01g59660 12001.m42740 protein transcription factor GAMYB, putative, expressed seq=cds; coord=8:171172099..1711…	26.25	16.3	20.75	17.35	18.65	32.8	8.3	6.65	8	5.4	7.8	12.95	3	57.75	33.25	45.5	46	0.989
GRMZM2G089361	zma-MIR319abcd; zma-MIR159cd	'weakly similar to ( 107) AT1G30210 | Symbols: TCP24 | TCP24 (TEOSINTE BRANCHED1, CYCLOIDEA, AND PCF FAMILY 24); transcription factor | chr1:10628754-10629728 REVERSEmoderately similar to ( 248) loc_os03g57190 12003.m10638 protein TCP family transcription factor containing protein, expressed seq=cds; coord=5:4945066..4946626:-1; parent_gene=GRMZM2G089361'	0.55	2.3	1.1	1.35	2.6	1.3	3.55	7.35	4.35	1.3	3.1	3.6	4.5	280.5	296.5	288.5	303.75	0.95
GRMZM2G115516	zma-MIR319abcd; zma-MIR159cd	'very weakly similar to (82.8) loc_os03g57190 12003.m10638 protein TCP family transcription factor containing protein, expressed seq=cds; coord=1:285310408..285314533:1; parent_gene=GRMZM2G115516'	4.75	4.65	6.2	5.9	6.15	1	8.85	17.2	21.75	1.7	9.95	9.85	4.5	280.5	296.5	288.5	299.5	0.963
GRMZM2G180568	zma_MIR319abcd	'very weakly similar to (99.8) AT1G30210 | Symbols: TCP24 | TCP24 (TEOSINTE BRANCHED1, CYCLOIDEA, AND PCF FAMILY 24); transcription factor | chr1:10628754-10629728 REVERSEmoderately similar to ( 239) loc_os12g42190 12012.m07998 protein transposon protein, putative, unclassified, expressed seq=cds; coord=7:168217960..168219041:-1; parent_gene=GRMZM2G180568'	0	0	0	0.05	0	0	0	0	0	0	0	0	3.5
GRMZM2G020468	zma-MIR390ab	tas3b /'seq=cds; coord=9:134289548..134290621:-1; parent_gene=GRMZM2G020468'	61.9	181.35	72.8	119.2	69.2	32.5	27.05	98.15	200.05	102.35	321.25	519.45	4.5
GRMZM2G084821	zma-MIR390ab	tas3c /'seq=cds; coord=1:51293855..51295040:1; parent_gene=GRMZM2G084821'	34.65	115.45	32.65	55.9	15.55	4.5	4.9	5.3	15.2	26.8	14.35	13.45	4	232.75	82.25	157.5	165	0.955
GRMZM2G124744	zma-MIR390ab	tas3d /'seq=cds; coord=10:85311893..85313111:1; parent_gene=GRMZM2G124744'	4.85	54.6	6.3	27.7	17.15	18.55	10.05	10.65	44.05	96.2	61	13.6	4.5	101.25	50.75	76	83.25	0.913
GRMZM2G155490	zma-MIR390ab	tas3f／'seq=cds; coord=4:174849541..174850277:1; parent_gene=GRMZM2G155490'	1.9	1.5	0.8	0.2	5.9	10.45	4.5	3.15	0.6	0.65	1.9	0.7	4
GRMZM2G178686	zma-MIR390ab	tas3a /'seq=cds; coord=8:130211033..130212238:-1; parent_gene=GRMZM2G178686'	3.95	22	8.05	10.5	12.5	13.85	20.05	36.15	41	25.7	63.75	18.55	4.5	5.5	24	14.75	16.75	0.881
GRMZM2G512113	zma-MIR390ab	tas3i /'seq=cds; coord=5:183516837..183517601:1; parent_gene=GRMZM2G512113'	5.35	38.75	5.25	10.35	54	61.05	32.55	64.7	99.35	7.4	274.5	54.35	4	85	26.5	55.75	71	0.785
GRMZM2G588623	zma-MIR390ab	tas3h/'seq=cds; coord=9:44170085..44170658:-1; parent_gene=GRMZM2G588623'	0	1.1	0	0	0	0	0	0	0	0.05	0	0.15	4
GRMZM5G806469	zma-MIR390ab	tas3e /'seq=cds; coord=4:136042171..136042858:1; parent_gene=GRMZM5G806469'	5.05	25.05	6.85	10.05	56.8	26.1	20.75	27.95	35.2	13	91.9	49.5	4	7	19.5	13.25	19.25	0.688
GRMZM2G135978	zma-MIR393abc	'weakly similar to ( 137) AT3G62980 | Symbols: TIR1 | TIR1 (TRANSPORT INHIBITOR RESPONSE 1); auxin binding / protein binding / ubiquitin-protein ligase | chr3:23273479-23276181 REVERSEweakly similar to ( 199) loc_os05g05800 12005.m05107 protein transport inhibitor response 1 protein, putative, expressed seq=cds; coord=8:127117327..127118492:-1; parent_gene=GRMZM2G135978'	144.6	108.55	147.5	145.75	148.7	178.25	130.8	122.75	144.7	110.2	129.05	146.8	1	587.75	624.75	606.25	649.75	0.933
GRMZM2G137451	zma_MIR393abc	'highly similar to ( 768) AT3G26810 | Symbols: AFB2 | AFB2 (AUXIN SIGNALING F-BOX 2); auxin binding / ubiquitin-protein ligase | chr3:9868342-9870464 FORWARDhighly similar to ( 995) loc_os04g32460 12004.m35129 protein transport inhibitor response 1 protein, putative, expressed seq=cds; coord=10:110996613..111000922:-1; parent_gene=GRMZM2G137451'	104.45	108.3	108.75	88.05	105.15	102.7	115.3	105.1	118.5	119.6	103.4	103.15	3
GRMZM5G848945	zma-MIR393abc	'highly similar to ( 669) AT3G26810 | Symbols: AFB2 | AFB2 (AUXIN SIGNALING F-BOX 2); auxin binding / ubiquitin-protein ligase | chr3:9868342-9870464 FORWARDhighly similar to ( 852) loc_os04g32460 12004.m35129 protein transport inhibitor response 1 protein, putative, expressed seq=cds; coord=2:65035719..65038744:1; parent_gene=GRMZM5G848945'	193	170.55	169.5	152.55	188.15	252.2	192.15	181.25	212.85	220.05	216.8	241.65	1	27.75	50.75	39.25	56.75	0.692
GRMZM2G064954	zma-MIR394ab	'highly similar to ( 513) AT1G27340 | Symbols: | F-box family protein | chr1:9495741-9497857 FORWARDhighly similar to ( 804) loc_os01g69940 12001.m13043 protein F-box domain containing protein, expressed seq=cds; coord=8:161103602..161107787:1; parent_gene=GRMZM2G064954'	57.25	63.7	56	45.4	86.3	100.6	72.65	68.5	66.65	74.2	19.7	103.85	0	37.75	38.75	38.25	43	0.89
GRMZM2G119650	zma-MIR394ab	'highly similar to ( 513) AT1G27340 | Symbols: | F-box family protein | chr1:9495741-9497857 FORWARDhighly similar to ( 792) loc_os01g69940 12001.m13043 protein F-box domain containing protein, expressed seq=cds; coord=3:158566844..158570457:-1; parent_gene=GRMZM2G119650'	85.5	74.1	72.85	49.25	104.15	126.55	81.65	91.45	85.25	78.05	20.15	115.25	0	39.75	16.75	28.25	34.5	0.819
GRMZM2G051270	zma_MIR395abdefghijnp; zma_MIR395clm; zma_MIR395k; zma_MIR395o	'highly similar to ( 648) AT4G14680 | Symbols: APS3 | APS3; sulfate adenylyltransferase (ATP) | chr4:8413443-8415311 REVERSEhighly similar to ( 767) loc_os03g53230 12003.m10296 protein bifunctional 3-phosphoadenosine 5-phosphosulfate synthetase, putative, expressed seq=cds; coord=5:7702248..7706223:1; parent_gene=GRMZM2G051270'	51	66.75	66.85	55.45	50.1	62.15	53.6	91.15	75.8	172.5	57.2	69.1	1.5
GRMZM2G149952	zma_MIR395abdefghijnp; zma_MIR395clm; zma_MIR395k; zma_MIR395o	'highly similar to ( 645) AT4G14680 | Symbols: APS3 | APS3; sulfate adenylyltransferase (ATP) | chr4:8413443-8415311 REVERSEhighly similar to ( 748) loc_os03g53230 12003.m10296 protein bifunctional 3-phosphoadenosine 5-phosphosulfate synthetase, putative, expressed seq=cds; coord=1:275090703..275094517:-1; parent_gene=GRMZM2G149952'	35.8	37.45	34.85	40.05	17.6	21.6	16.3	21.85	17.75	27.95	13.8	19.4	0.5
GRMZM2G018414	zma-MIR396ab; zma-MIR396cd; zma-MIR396ef	'weakly similar to ( 180) AT4G37740 | Symbols: AtGRF2 | AtGRF2 (GROWTHREGULATING FACTOR 2); transcription activator | chr4:17725533-17727609 REVERSEhighly similar to ( 517) loc_os03g47140 12003.m09727 protein atGRF2, putative, expressed seq=cds; coord=1:257186167..257188884:-1; parent_gene=GRMZM2G018414'	29.25	41.65	25.4	14.8	64.45	32.3	51.85	46.95	74.95	29.2	63.5	75.4	3	216	115.5	165.75	184.25	0.9
GRMZM2G033612	zma-MIR396ab; zma-MIR396cd; zma-MIR396ef	'moderately similar to ( 254) loc_os03g47140 12003.m09727 protein atGRF2, putative, expressed seq=cds; coord=5:13806785..13809605:-1; parent_gene=GRMZM2G033612'	15.95	15.35	14.7	6.3	11.2	8.65	9.8	7.7	27	17	16.6	12.2	3	73.25	34.25	53.75	68.75	0.782
GRMZM2G034876	zma-MIR396ab; zma-MIR396cd; zma-MIR396ef	'weakly similar to ( 159) AT3G13960 | Symbols: AtGRF5 | AtGRF5 (GROWTH-REGULATING FACTOR 5); transcription activator | chr3:4608526-4610160 FORWARDmoderately similar to ( 295) loc_os02g47280 12002.m09763 protein growth-regulating factor, putative, expressed seq=cds; coord=5:200291901..200295328:-1; parent_gene=GRMZM2G034876'	144.9	58.3	119.5	91.55	71.65	120.25	45.25	47.75	81.65	30.4	71.95	65.1	3	1044.75	779.75	912.25	978.25	0.933
GRMZM2G041223	zma-MIR396ab; zma-MIR396cd; zma-MIR396ef	'weakly similar to ( 107) loc_os04g51190 12004.m10015 protein growth-regulating factor, putative, expressed seq=cds; coord=2:12195366..12197203:1; parent_gene=GRMZM2G041223'	56.45	39	48.6	34.8	45.1	31.6	22.65	31.5	72.55	16.45	46.5	33.85	3	3977.25	5380.25	4678.75	4747.5	0.986
GRMZM2G045977	zma_MIR396ab; zma_MIR396cd; zma_MIR396ef; zma_MIR396g	'weakly similar to ( 132) AT2G36400 | Symbols: AtGRF3 | AtGRF3 (GROWTH-REGULATING FACTOR 3); transcription activator | chr2:15270300-15272617 REVERSEmoderately similar to ( 285) loc_os02g45570 12002.m33821 protein growth-regulating factor, putative, expressed seq=cds; coord=5:196141332..196142725:1; parent_gene=GRMZM2G045977'	12.75	14.95	10.9	9.15	16.05	8.8	17.3	15.85	16.65	6.8	9.55	8.2	1
GRMZM2G067743	zma_MIR396ab; zma_MIR396cd; zma_MIR396ef; zma_MIR396g	'weakly similar to ( 149) AT3G13960 | Symbols: AtGRF5 | AtGRF5 (GROWTH-REGULATING FACTOR 5); transcription activator | chr3:4608526-4610160 FORWARDmoderately similar to ( 207) loc_os06g10310 12006.m05749 protein growth-regulating factor 1, putative seq=cds; coord=9:9812369..9814204:-1; parent_gene=GRMZM2G067743'	34	32.7	29.35	11.95	53.8	23.9	50.1	34.75	53.65	57.25	109.85	44.05	1
GRMZM2G098594	zma-MIR396ab; zma-MIR396ef	'very weakly similar to (99.4) loc_os06g02560 12006.m04989 protein growth-regulating factor, putative, expressed seq=cds; coord=6:60195347..60196491:-1; parent_gene=GRMZM2G098594'	30.65	40.95	24.4	24.55	43.4	38.45	30.55	34	39.15	11.05	59.45	51.05	3	2107	2600	2353.5	2389	0.985
GRMZM2G099862	zma-MIR396ab; zma-MIR396cd; zma-MIR396ef	'weakly similar to ( 153) AT2G22840 | Symbols: AtGRF1 | AtGRF1 (GROWTH-REGULATING FACTOR 1); transcription activator | chr2:9728841-9731141 FORWARDmoderately similar to ( 369) loc_os11g35030 12011.m07357 protein expressed protein seq=cds; coord=2:225159420..225162831:-1; parent_gene=GRMZM2G099862'	143.2	182.7	130	114.75	139.25	120.6	195.8	224.25	272.9	216.75	240.15	275.6	3	58.25	52.75	55.5	61.25	0.906
GRMZM2G105335	zma-MIR396ab; zma-MIR396cd; zma-MIR396ef	'weakly similar to ( 162) AT3G13960 | Symbols: AtGRF5 | AtGRF5 (GROWTH-REGULATING FACTOR 5); transcription activator | chr3:4608526-4610160 FORWARDmoderately similar to ( 408) loc_os02g53690 12002.m10398 protein atGRF5, putative, expressed seq=cds; coord=4:177122616..177124549:1; parent_gene=GRMZM2G105335'	33.65	47.85	37.2	17.55	53.5	82.85	44.15	40.75	68.7	54	106.75	110.05	3	63.75	123.25	93.5	116.5	0.803
GRMZM2G119359	zma-MIR396ab; zma-MIR396ef	'moderately similar to ( 260) loc_os06g02560 12006.m04989 protein growth-regulating factor, putative, expressed seq=cds; coord=9:25709471..25712485:1; parent_gene=GRMZM2G119359'	90.35	183.05	87.45	131.8	68.4	76	92.45	166.4	273.1	58.95	360.4	289.7	3	2107	2600	2353.5	2394.25	0.983
GRMZM2G124566	zma-MIR396ab; zma-MIR396cd; zma-MIR396ef	'weakly similar to ( 131) AT2G36400 | Symbols: AtGRF3 | AtGRF3 (GROWTH-REGULATING FACTOR 3); transcription activator | chr2:15270300-15272617 REVERSEmoderately similar to ( 291) loc_os02g45570 12002.m33821 protein growth-regulating factor, putative, expressed seq=cds; coord=4:155804713..155806066:1; parent_gene=GRMZM2G124566'	34.9	29.55	29.05	33.95	19.15	18.5	18.45	25.85	46.8	15.5	24.8	20.1	3	145.75	144.75	145.25	162	0.897
GRMZM2G129147	zma-MIR396ab; zma-MIR396cd; zma-MIR396ef	'weakly similar to ( 132) AT3G13960 | Symbols: AtGRF5 | AtGRF5 (GROWTH-REGULATING FACTOR 5); transcription activator | chr3:4608526-4610160 FORWARDmoderately similar to ( 404) loc_os04g51190 12004.m10015 protein growth-regulating factor, putative, expressed seq=cds; coord=10:140968794..140972587:-1; parent_gene=GRMZM2G129147'	95.5	59.95	77.6	21.15	171.7	126.95	115.15	78.65	115.45	23.7	91.75	62.05	3	3977.25	5358.25	4667.75	4706.25	0.992
GRMZM2G178261	zma-MIR396ab; zma-MIR396cd; zma-MIR396ef	'weakly similar to ( 185) AT2G22840 | Symbols: AtGRF1 | AtGRF1 (GROWTH-REGULATING FACTOR 1); transcription activator | chr2:9728841-9731141 FORWARDhighly similar to ( 590) loc_os03g51970 12003.m10176 protein growth-regulating factor 1, putative, expressed seq=cds; coord=1:272350459..272353057:1; parent_gene=GRMZM2G178261'	106.8	126.65	98	93.55	172.55	137.3	259.9	275.7	227.45	177.5	238.2	235.75	3.5	359.25	208.25	283.75	293.25	0.968
GRMZM5G850129	zma_MIR396ab; zma_MIR396cd; zma_MIR396ef; zma_MIR396g	'weakly similar to ( 145) AT3G13960 | Symbols: AtGRF5 | AtGRF5 (GROWTH-REGULATING FACTOR 5); transcription activator | chr3:4608526-4610160 FORWARDweakly similar to ( 192) loc_os02g53690 12002.m10398 protein atGRF5, putative, expressed seq=cds; coord=6:108305466..108307189:1; parent_gene=GRMZM5G850129'	10.95	11	11.45	4.75	24.35	15.85	24.7	25.05	28.6	5.8	18.55	50.3	1
GRMZM5G853392	zma-MIR396ab; zma-MIR396cd; zma-MIR396ef	'weakly similar to ( 162) AT4G37740 | Symbols: AtGRF2 | AtGRF2 (GROWTHREGULATING FACTOR 2); transcription activator | chr4:17725533-17727609 REVERSEmoderately similar to ( 421) loc_os03g51970 12003.m10176 protein growth-regulating factor 1, putative, expressed seq=cds; coord=5:8698337..8700355:-1; parent_gene=GRMZM5G853392'	23.25	34.7	20.75	19.45	41.25	28.45	34.5	30.55	26.05	31.25	26.3	29.3	3.5	16	15.5	15.75	21.5	0.733
GRMZM5G893117	zma-MIR396ab; zma-MIR396cd; zma-MIR396ef	'weakly similar to ( 110) AT3G13960 | Symbols: AtGRF5 | AtGRF5 (GROWTH-REGULATING FACTOR 5); transcription activator | chr3:4608526-4610160 FORWARDweakly similar to ( 157) loc_os02g53690 12002.m10398 protein atGRF5, putative, expressed seq=cds; coord=5:211724540..211725862:-1; parent_gene=GRMZM5G893117'	0.15	0.25	0.2	0.1	0.35	0.3	0.25	0.25	0.35	0.25	0.7	0.3	3	63.75	123.25	93.5	116.5	0.803
GRMZM2G164467	zma_MIR397b	'highly similar to ( 874) AT5G60020 | Symbols: LAC17, ATLAC17 | LAC17 (laccase 17); laccase | chr5:24168072-24170223 FORWARDmoderately similar to ( 229) ASO_CUCSA L-ascorbate oxidase precursor (EC 1.10.3.3) (Ascorbase) (ASO) - Cucumis sativus (Cucumber)highly similar to ( 993) loc_os01g62480 12001.m12370 protein L-ascorbate oxidase precursor, putative, expressed seq=cds; coord=1:260072697..260076…	0.55	0.4	0.5	0.45	0.6	0.5	0.95	0.6	0.4	0.5	0.4	0.45	3
GRMZM2G400390	zma_MIR397b	'highly similar to ( 541) AT3G09220 | Symbols: LAC7 | LAC7 (laccase 7); laccase | chr3:2827434-2830477 REVERSEmoderately similar to ( 217) ASO_CUCMA L-ascorbate oxidase precursor (EC 1.10.3.3) (Ascorbase) (ASO) - Cucurbita maxima (Pumpkin) (Winter squash)highly similar to ( 761) loc_os01g63180 12001.m12435 protein L-ascorbate oxidase precursor, putative, expressed seq=cds; coord=3:179122113..1791…	0	0	0	0	0	0	0	0	0	0	0	0	1.5
GRMZM2G336337	zma_MIR397b	'highly similar to ( 769) AT5G05390 | Symbols: LAC12 | LAC12 (laccase 12); laccase | chr5:1594753-1597042 FORWARDmoderately similar to ( 214) ASO_CUCSA L-ascorbate oxidase precursor (EC 1.10.3.3) (Ascorbase) (ASO) - Cucumis sativus (Cucumber)highly similar to ( 974) loc_os01g61160 12001.m12243 protein L-ascorbate oxidase precursor, putative, expressed seq=cds; coord=8:170035152..170037679:-1; par…	0	0.1	0	0	0	0.05	0	0	0	0	0	0	2.5
GRMZM2G132169	zma_MIR397b	'highly similar to ( 807) AT5G05390 | Symbols: LAC12 | LAC12 (laccase 12); laccase | chr5:1594753-1597042 FORWARDmoderately similar to ( 221) ASO_TOBAC L-ascorbate oxidase precursor (EC 1.10.3.3) (Ascorbase) (ASO) - Nicotiana tabacum (Common tobacco)nearly identical (1005) loc_os01g61160 12001.m12243 protein L-ascorbate oxidase precursor, putative, expressed seq=cds; coord=3:183644921..183647436:…	0	0	0	0	0	0	0	0	0	0	0	0	2.5
GRMZM2G447271	zma_MIR397b	'highly similar to ( 826) AT5G60020 | Symbols: LAC17, ATLAC17 | LAC17 (laccase 17); laccase | chr5:24168072-24170223 FORWARDmoderately similar to ( 211) ASO_CUCSA L-ascorbate oxidase precursor (EC 1.10.3.3) (Ascorbase) (ASO) - Cucumis sativus (Cucumber)highly similar to ( 936) loc_os01g62480 12001.m12370 protein L-ascorbate oxidase precursor, putative, expressed seq=cds; coord=8:168753962..168757…	0	0	0.15	0	0	0	0	0	0.15	0.8	0	0.05	3
GRMZM2G305526	zma_MIR397b	'highly similar to ( 787) AT5G60020 | Symbols: LAC17, ATLAC17 | LAC17 (laccase 17); laccase | chr5:24168072-24170223 FORWARDmoderately similar to ( 205) ASO_CUCMA L-ascorbate oxidase precursor (EC 1.10.3.3) (Ascorbase) (ASO) - Cucurbita maxima (Pumpkin) (Winter squash)highly similar to ( 934) loc_os03g16610 12003.m07094 protein L-ascorbate oxidase precursor, putative, expressed seq=cds; coord=1:3…	0	0	0	0	0	0	0	0	0	0	0	0	3
GRMZM2G094375	zma_MIR397b	'moderately similar to ( 414) AT3G09220 | Symbols: LAC7 | LAC7 (laccase 7); laccase | chr3:2827434-2830477 REVERSEweakly similar to ( 143) ASO_CUCSA L-ascorbate oxidase precursor (EC 1.10.3.3) (Ascorbase) (ASO) - Cucumis sativus (Cucumber)highly similar to ( 592) loc_os12g15920 12012.m05551 protein copper ion binding protein, putative, expressed seq=cds; coord=10:12167272..12169103:-1; parent_gen…	0	0	0	0	0	0	0	0	0	0	0	0	3
GRMZM2G146152	zma_MIR397b	'highly similar to ( 693) AT5G60020 | Symbols: LAC17, ATLAC17 | LAC17 (laccase 17); laccase | chr5:24168072-24170223 FORWARDmoderately similar to ( 244) ASO_CUCSA L-ascorbate oxidase precursor (EC 1.10.3.3) (Ascorbase) (ASO) - Cucumis sativus (Cucumber)highly similar to ( 838) loc_os05g38390 12005.m08018 protein L-ascorbate oxidase precursor, putative seq=cds; coord=6:151543068..151545861:-1; par…	0	0.6	0.6	0.1	0.55	0.65	0.1	0.15	0.15	3.45	0.5	0.25	3.5
GRMZM2G388587	zma_MIR397b	'highly similar to ( 697) AT5G05390 | Symbols: LAC12 | LAC12 (laccase 12); laccase | chr5:1594753-1597042 FORWARDmoderately similar to ( 211) ASO_CUCSA L-ascorbate oxidase precursor (EC 1.10.3.3) (Ascorbase) (ASO) - Cucumis sativus (Cucumber)highly similar to ( 847) loc_os12g01730 12012.m04176 protein L-ascorbate oxidase precursor, putative, expressed seq=cds; coord=4:183733037..183735726:1; pare…	0	0.05	0	0	0	0	0	0	0	0.05	0	0	3.5
GRMZM2G058522	zma-MIR398ab	'moderately similar to ( 269) AT1G08830 | Symbols: CSD1 | CSD1 (COPPER/ZINC SUPEROXIDE DISMUTASE 1); superoxide dismutase | chr1:2827700-2829053 FORWARDmoderately similar to ( 312) SODC5_MAIZE Superoxide dismutase [Cu-Zn] 4AP (EC 1.15.1.1) - Zea mays (Maize)moderately similar to ( 293) loc_os07g46990 12007.m079585 protein superoxide dismutase 2, putative, expressed seq=cds; coord=9:129274385..129…	506.85	499	512.3	440.05	360.05	384.15	403.45	435.35	517.6	473.95	803.7	785.6	5	336.5	166.5	251.5	364	0.691
GRMZM2G169890	zma-MIR398ab	'moderately similar to ( 269) AT1G08830 | Symbols: CSD1 | CSD1 (COPPER/ZINC SUPEROXIDE DISMUTASE 1); superoxide dismutase | chr1:2827700-2829053 FORWARDmoderately similar to ( 309) SODC4_MAIZE Superoxide dismutase [Cu-Zn] 4A (EC 1.15.1.1) - Zea mays (Maize)moderately similar to ( 291) loc_os07g46990 12007.m079585 protein superoxide dismutase 2, putative, expressed seq=cds; coord=1:60145116..60148…	135.15	130.9	128.35	136.2	35.85	58.7	43.4	54.2	68.1	65.95	116.45	119.25	5			251.5	364	0.691
GRMZM2G106928	zma_MIR398ab	'moderately similar to ( 277) AT2G28190 | Symbols: CSD2, CZSOD2 | CSD2 (COPPER/ZINC SUPEROXIDE DISMUTASE 2); superoxide dismutase | chr2:12014548-12016303 FORWARDmoderately similar to ( 295) SODCP_ORYSA Superoxide dismutase [Cu-Zn], chloroplast precursor (EC 1.15.1.1) - Oryza sativa (Rice)moderately similar to ( 295) loc_os08g44770 12008.m080238 protein superoxide dismutase, chloroplast precursor…	107.05	112.35	107.7	124.95	80.15	69.05	87.85	80.35	75.5	70.7	122.8	90.7	5	336.5	166.5
GRMZM2G075870	zma_MIR399b; zma_MIR399d; zma_MIR399eij	'highly similar to ( 736) AT3G54700 | Symbols: | carbohydrate transmembrane transporter/ phosphate transmembrane transporter/ sugar:hydrogen symporter | chr3:20248463-20250070 REVERSEhighly similar to ( 818) loc_os03g04360 12003.m05966 protein inorganic phosphate transporter 1-7, putative, expressed seq=cds; coord=1:8037341..8039339:-1; parent_gene=GRMZM2G075870'	0	0	0	0	0	0	0	0	0	0	0	0	4
GRMZM2G070087	zma_MIR399b	'highly similar to ( 741) AT3G54700 | Symbols: | carbohydrate transmembrane transporter/ phosphate transmembrane transporter/ sugar:hydrogen symporter | chr3:20248463-20250070 REVERSEhighly similar to ( 860) loc_os03g05640 12003.m06087 protein inorganic phosphate transporter 1-7, putative, expressed seq=cds; coord=1:11211042..11213027:-1; parent_gene=GRMZM2G070087'	0	0	0	0	0	0	0	0	0	0	0	0	4.5
GRMZM2G004012	zma-MIR408	'weakly similar to ( 122) AT2G02850 | Symbols: ARPN | ARPN (PLANTACYANIN); copper ion binding / electron carrier | chr2:826630-827720 REVERSEweakly similar to ( 120) BABL_LILLO Chemocyanin precursor (Basic blue protein) (Plantacyanin) - Lilium longiflorum (Trumpet lily)weakly similar to ( 164) loc_os03g50140 12003.m10009 protein basic blue protein precursor, putative, expressed seq=cds; coord=1:2…	35.8	122.55	16.5	22.75	101.9	128.25	110.65	139.05	127.1	13.7	225.05	215.85	3.5	12	10.5	11.25	20	0.563
GRMZM2G053779	zma-MIR408	'weakly similar to ( 103) AT1G72230 | Symbols: | plastocyanin-like domain-containing protein | chr1:27188287-27189093 FORWARDweakly similar to ( 120) BCP_PEA Blue copper protein precursor - Pisum sativum (Garden pea)weakly similar to ( 137) loc_os02g52180 12002.m10249 protein uclacyanin-2 precursor, putative, expressed seq=cds; coord=7:128870093..128870975:1; parent_gene=GRMZM2G053779'	0.85	3.75	2.1	0.2	1.95	0.85	0.4	0.05	0.15	5.7	0.1	0.2	5	6.5	6.5	6.5	8.25	0.788
GRMZM2G122302	zma-MIR408	'weakly similar to ( 110) AT1G72230 | Symbols: | plastocyanin-like domain-containing protein | chr1:27188287-27189093 FORWARDweakly similar to ( 142) BCP_PEA Blue copper protein precursor - Pisum sativum (Garden pea)weakly similar to ( 173) loc_os06g11490 12006.m05866 protein blue copper protein precursor, putative, expressed seq=cds; coord=6:111182254..111183500:-1; parent_gene=GRMZM2G122302'	0	0.1	0.1	0.05	0.25	0.1	0	0	0	1	0.1	0.05	5	48	78.5	63.25	114	0.555
GRMZM2G082940	zma_MIR408	'very weakly similar to (97.4) AT1G72230 | Symbols: | plastocyanin-like domain-containing protein | chr1:27188287-27189093 FORWARDvery weakly similar to (90.5) BCP_PEA Blue copper protein precursor - Pisum sativum (Garden pea)weakly similar to ( 142) loc_os02g43660 12002.m09400 protein blue copper protein precursor, putative, expressed seq=cds; coord=4:151404688..151405645:-1; parent_gene=GRMZM2G…	0	0	0	0	0	0	0	0	0	0	0	0	4
GRMZM2G352678	zma_MIR408	'weakly similar to ( 104) AT2G02850 | Symbols: ARPN | ARPN (PLANTACYANIN); copper ion binding / electron carrier | chr2:826630-827720 REVERSEweakly similar to ( 105) BABL_CUCSA Basic blue protein (Cusacyanin) (Plantacyanin) (CBP) - Cucumis sativus (Cucumber)weakly similar to ( 158) loc_os03g15340 12003.m06971 protein chemocyanin precursor, putative, expressed seq=cds; coord=1:36419515..36420602:1…	0.85	0.55	1	0.25	1.25	0.65	1.5	3.2	5.65	2.75	0.25	1.25	3.5
GRMZM5G866053	zma_MIR408	'very weakly similar to (89.7) AT5G26330 | Symbols: | plastocyanin-like domain-containing protein / mavicyanin, putative | chr5:9241614-9242635 REVERSEweakly similar to ( 112) BABL_LILLO Chemocyanin precursor (Basic blue protein) (Plantacyanin) - Lilium longiflorum (Trumpet lily)weakly similar to ( 124) loc_os06g15600 12006.m06273 protein chemocyanin precursor, putative seq=cds; coord=9:31696661.…	0	0	0	0	0	0	0	0	0	0	0	0	2
GRMZM2G023847	zma_MIR408	'very weakly similar to (90.5) AT2G32300 | Symbols: UCC1 | UCC1 (UCLACYANIN 1); copper ion binding / electron carrier | chr2:13722510-13723464 FORWARDvery weakly similar to (97.8) BCP_PEA Blue copper protein precursor - Pisum sativum (Garden pea)weakly similar to ( 108) loc_os08g37670 12008.m07752 protein blue copper protein precursor, putative, expressed seq=cds; coord=1:182095259..182096377:-1;…	0	0	0	0	0	0	0	0	0	0	0	0	3
GRMZM2G097851	zma_MIR408	'weakly similar to ( 108) AT2G32300 | Symbols: UCC1 | UCC1 (UCLACYANIN 1); copper ion binding / electron carrier | chr2:13722510-13723464 FORWARDweakly similar to ( 108) BCP_PEA Blue copper protein precursor - Pisum sativum (Garden pea)weakly similar to ( 164) loc_os02g43660 12002.m09400 protein blue copper protein precursor, putative, expressed seq=cds; coord=5:190958912..190960019:-1; parent_ge…	0	0	0	0	0	0	0	0	0	0	0	0	3.5
GRMZM2G043300	zma_MIR408	'weakly similar to ( 126) AT2G02850 | Symbols: ARPN | ARPN (PLANTACYANIN); copper ion binding / electron carrier | chr2:826630-827720 REVERSEweakly similar to ( 148) BABL_LILLO Chemocyanin precursor (Basic blue protein) (Plantacyanin) - Lilium longiflorum (Trumpet lily)weakly similar to ( 180) loc_os03g63390 12003.m11207 protein chemocyanin precursor, putative, expressed seq=cds; coord=10:1212865…	0	0.1	0	0	0	0	0	0	0	0.45	0	0	5
	zma_MIR482	No validated targets detected in the apex, not conserved in Arabidopsis
	zma_MIR528	No validated targets detected in the apex, not conserved in Arabidopsis
	zma_MIR529	No validated targets detected in the apex, not conserved in Arabidopsis
GRMZM2G166976	zma_MIR827	'highly similar to ( 821) AT1G63010 | Symbols: | SPX (SYG1/Pho81/XPR1) domain-containing protein | chr1:23347972-23351026 REVERSEhighly similar to (1000) loc_os04g48390 12004.m09775 protein beta-lactamase, class A, putative, expressed seq=cds; coord=5:196027384..196033252:1; parent_gene=GRMZM2G166976'	8.1	5.45	7.45	9	1.75	1.55	1.85	2.5	4.6	2	2.05	3.85	3
	zma_MIR1432	No validated targets detected in the apex, not conserved in Arabidopsis
	zma_MIR2118	No validated targets detected in the apex, not conserved in Arabidopsis
	zma_MIR2275	No validated targets detected in the apex, not conserved in Arabidopsis

## Sheet: Dataset 4
Supplemental Dataset 4: miRNA target site information and relative PARE levels.
Red text: mismatch; blue text: UG bulge; "- ": insertion
→ 5': five prime half of ORF; → 3': three prime half of ORF; 5' UTR: five prime untranslated region; 3'UTR: three prime untranslated region.
miRNA family	miRNA	Reverse miRNA sequence	Target gene ID	Binding site sequence	Binding site position	5' Flanking sequence	3' Flanking sequence	Target Finder Score	PARE sign. (RPM)	Target exp in miRNA domain (RPM)	Rel. PARE sign.	miRNA Exp (RPM)	miRNA/target
miR156	miR156abcdefghil miR156k	CACGAGUGAGAGAAGACAGU CACGAGCGAGAGAAGACAGU	AC233751.1_FG002	GUGCUCUCUCUCUUCUGUCA	→ 5'	TCGCGTGCTCGACTCGGACT	GCGCCGGCCAACTACTCCGG	1	0.85	1.05	0.81	58.79	55.99
			GRMZM2G061734	GUGCUCUCUCUCUUCUGUCA	→ 5'	CCCCGTGCTGGACTCGGATT	TCCCCCGCCAACTCTTCCAG	1	7.26667	5.25	1.38		11.2
			GRMZM2G065451	GUGCUCUCUCUCUUCUGUCA	→ 3'	CGGCGCCCCGGACCTTCAGC	AACAGTCCGGCCGGTGGCGG	1	3.98333	65.15	0.06		0.9
			GRMZM2G067624	AUGCUCUCUCUCUUCUGUCA	3'UTR	TAAAAACCTACTACGTCAGC	TGCAGGACGCACGCACCTAG	2	97.1	31.2	3.11		1.88
			GRMZM2G097275	GUGCUCUCUCUCUUCUGUCA	→ 5'	CCCACAACCGGACCTTCATC	AACAGCTGGGCTGGTGGTGG	1	17.75	11.35	1.56		5.18
			GRMZM2G101511	GUGCUCUCUCUCUUCUGUCA	→ 5'	TCGCGTGCTCGACTCGGACT	GCGCCGGCCAACTCCTCCGG	1	0.85	1.25	0.68		47.03
			GRMZM2G106798	GUGCUCUCUCUCUUCUGUCA	→ 5'	CGGCACACTGGGCCCCGAGT	TCGTCGCTGCGTCGCCCCTC	1	1.03333	17.5	0.06		3.36
			GRMZM2G113779	AUGCUCUCUCUCUUCUGUCA	→ 5'	ACTTCCAGATCAGATAAAGC	TGCAGCAGGATATGCTAGCA	2	2	1.6	1.25		36.74
			GRMZM2G126018	GUGCUCUCUCUCUUCUGUCA	→ 5'	TACCGCGGCCGACTCCAGCT	ACTCAGCCATGGGATACGCC	1	83.1167	13.8	6.02		4.26
			GRMZM2G148467	GUGCUCUCUCUCUUCUGUCA	→ 5'	GTCGTCCCCGGCGGCGGCTG	TCGGCCAGAGGCAGCGTGGC	1	0.516667	5.45	0.09		10.79
			GRMZM2G160917	GUGCUCUCUCUCUUCUGUCA	→ 5'	AGTCCCCGCGGACTCCAGCT	ACTCAGCCATGGGATGCTGC	1	83.1167	34.5	2.41		1.7
			GRMZM2G163813	GUGCUCUCUCUCUUCUGUCA	→ 5'	TGGAGCACCGGATCTTCAGC	GTTGGCGCCTGCGGATTGCC	1	5.93333	14.6	0.41		4.03
			GRMZM2G307588	GUGCUCUCUCUCUUCUGUCA	→ 5'	AGTTGCCGCCGACTCCAGCT	ACTCAGCCATGGGACACGAC	1	83.1167	14.15	5.87		4.15
			GRMZM2G371033	GUGCUCUCUCUCUUCUGUCA	→ 5'	CAAGCACAGCAACGGCAACT	GACAACCCGACACCAGCACA	1	10.6	4.7	2.26		12.51
			GRMZM2G414805	GUGCUCUCUCUCUUCUGUCA	→ 5'	CGGAGGCCCAGAAGGTGGGC	GACGGCTCGTGGGGCTCGAG	1	16.3833	38.75	0.42		1.52
			GRMZM2G460544	GUGCUCUCUCUCUUCUGUCA	→ 5'	AGTCCCCACGGACTCTAGCT	ACTCAGCCATGGGACGCTGC	1	83.1167	17	4.89		3.46
			GRMZM5G806833	GUGCUCUCUCUCUUCUGUCA	→ 5'	CGCCGTGCTCGACTCGGATT	TCCCCCGCCAACTCCTCCAG	1	7.26667	7.8	0.93		7.54
			GRMZM5G878561	GUGCUCUCUCUCUUCUGUCA	→ 3'	CAAGCAGAGCAACGGCAACT	GACAACCCGACATCAGCACA	1	10.6	0.5	21.2		117.58
miR159	miR159abfjk	GUCUCGAGGGAAGUUAGGUUU	GRMZM2G028054	UGGAGCCCCCUUCAGUCCAAA	→ 5'	CACAAATGGTCCTTCGAAGA	ATAGCAGGCTCAAGTATACT	3	0	87.4	0	2203.34	25.2098
			GRMZM2G093789	CAGAGAUUCCUUCGAUCCAAA	5'UTR	CATATTCGGTTCCATTCAGA	GTTCCAGCTATAGCCCAAGT	2.5	0.566667	72.4	0.00782689		30.4329
			GRMZM2G139688	UGGAGCUCCCUUCACUCCAAG	→ 5'	CACAAATGGTCCTTTGAAGA	ATACTGAATCTGATCCAAAT	3.5	5.68333	16.4	0.346545		134.35
			GRMZM2G423833	CAGAGAUCCCUUCGAUCCAAA	→ 5'	CATATTCGGTTCCATTCAGA	GTTCCAGCTATAGCCCAAGT	2	0.566667	30.55	0.0185488		72.1224
miR160	miR60abcdg	ACCGUAUGUCCCUCGGUCCGU	GRMZM2G081406	AGCCAUACAGGGAGCCAGGCA	→ 3'	CCGGCCGGCAGTGCTCCTGC	TGCGCAATTCGTTCCACCTT	2	116.717	71.85	1.62445	84.43	1.17509
			GRMZM2G153233	AGGCAUACAGGGAGCCAGGCA	→ 5'	TTCTCGGACATCGCTCCTGC	TGCTCAGTTCGGTCTACCAC	1	18.9833	104.4	0.181833		0.808716
			GRMZM2G159399	AGGCAUACAGGGAGCCAGGCA	→ 5'	TTCTCGGACATCGCTCCTGC	TGCTCAATTTGGTTTACCCC	1	12.6333	156.85	0.080544		0.538285
			GRMZM2G390641	AGGCAUACAGGGAGCCAGGCA	→ 3'	GACGGCGGCACTCCTCCTGC	TGCGCAATTCGGCATATCTT	1	117.4	8.25	14.2303		10.2339
			GRMZM5G808366	UAGCAUGCAGGGAGCCAGGCA	→ 5'	CAGGGGCCACCAATTCCTGC	CACCGGCCCTTGTGCTGCGC	1.5	1.78333	6.25	0.285333		13.5088
miR162	miR162	ACCUACGUCUCCAAA-UAGCU	GRMZM2G040762	UGGAUGCAGAGGUUUUAUCGA	→ 5'	TCTTATTTTTGGCAATGAGC	CGACGATGGATCTCTTTGTT	2	0.4	309.6	0.00129199	40.45	0.130652
miR164	miR164abcdg	ACGUGCACGGGACGAAGAGGU	GRMZM2G114850	AGCAGGUGCCCUGCUUCUCCA	→ 5'	CGCCACCGCCGGCGCGCTCG	GCTTCAACAACAACACTGCC	2	0.4	9.55	0.0418848	102.43	10.7257
			GRMZM2G139700	AGCUCGUGCCCUGCUUCUCCA	→ 5'	CAACCCGGTCACCGGGCGAG	CTACCGCCAGTCCCCTGGAA	2	0.433333	26.45	0.0163831		3.87259
			GRMZM2G393433	AGCUCGUGCCCUGCUUCUCCA	→ 5'	CAACCTGGTCACCGGCCGTG	CTGCCACCATTAACGGCCCC	2	2.31667	458.3	0.00505491		0.2235
miR166	miR166abcdghi miR166ml miR166jnk	CCCCUUACUUCGGACCAGGCU CUCCUUACUUCGGACCAGGCU UCCCUAACUUCGGACCAGGCU	GRMZM2G003509	UUGGGAUGAAGCCUGGUCCGG	→ 5'	TGTCAACTGGGTGCAGATGG	ATTCCGTTGGAATCATCGCT	2	2.8	24.15	0.12	420.68	17.42
			GRMZM2G029692	ACUGAUUGCAGCCUGGUCCGG	→ 5'	CTGACCGTTTCAAACGTGAT	ATTCCGCGCTGTTTCGCACA	4.5	0	1.1	0		382.44
			GRMZM2G042250	CUGGGAUGAAGCCUGGUCCGG	5'UTR & → 5'	TATTGATTGGGTCCAGATGC	ATTCGGTTGGTATTGTGGCC	2	17.0333	95.6	0.18		4.4
			GRMZM2G066341	GGGAUGUGAAGUCUGGUCCAG	→ 5'	GCCGTGCAGCAGGTCCTACG	AGGTCACCGTGCCCGGCGGC	5	1.15	120.1	0.01		3.5
			GRMZM2G109987	CUGGGAUGAAGCCUGGUCCGG	→ 5'	TATTGATTGGGTCCAGATGC	ATTCAGTTGGTATCGTGGCC	2	16.25	265.3	0.06		1.59
			GRMZM2G178102	UUGGGAUGAAGCCUGGUCCGG	→ 5'	TGTCAACTGGGTGCAAATGG	ATTCCGTTGGAATCATCGCT	2	2.8	52.3	0.05		8.04
			GRMZM2G469551	CUGGGAUGAAGCCUGGUCCGG	5'UTR	TATTGATTGGGTCCAGATGC	ATTCTTTTGGTATTGTGACC	2	2.96667	52.55	0.06		8.01
miR167	miR167abcd miR167efghi	AUCUAGUACGACCGUCGAA-GU GUCUAGUACGACCGUCGAA-GU	GRMZM2G028980	GAGAUCAGGCUGGCAGCUUGUA	→ 3'	GGCCAGCTGGAAGACCCTCT	TTTGTTGACAGGGAGGACGA	5	0	123.4	0	2793.5	22.6378
			GRMZM2G035405	GAGAUCAGGCUGGCAGCUUGUA	→ 5'	GGCCAGTTGGAAGACCCATT	TTCGTCGACCGTGAGGAGGA	5	12.0667	169.8	0.071064		16.4517
			GRMZM2G073750	AAGAUCAGGCUGGCAGCUUGUA	→ 5'	GGCCAACTGGAGGACCCTGT	TTCGTTGACCGGGAAAACGA	5	0	54.25	0		51.4931
			GRMZM2G078274	UAGAUCAGGCUGGCAGCUUGUA	→ 5'	GGTCAGTTGGACGACCCTGA	TTTGTCGACAGGGAGAACGA	4	12.0667	352.9	0.0341929		7.91584
			GRMZM2G081158	AAGAUCAGGCUGGCAGCUUGUA	→ 5'	GGCCAACTGGAGGACCCTGC	TTCGTCGACCGGGAAAACGA	5	7.93333	64.9	0.122239		43.0431
			GRMZM2G475882	UAGAUCAGGCUGGCAGCUUGUA	→ 5'	GGTCAGTTGGATGACCCTGA	TTTGTCGACAGGGAGAACGA	4	7.93333	35.6	0.222846		78.4691
miR168	miR168ab	CAGGGCUAGACGUGGUUCGCU	GRMZM2G039455	UUCCCGAGCUGCACCAAGCCC	5'UTR	TCCAGGTCCATCCAGAACAG	CATACGTCCAGTATCAAGCC	5	2.33333	584.8	0.00398997	107.44	0.183721
			GRMZM2G361518	CUCCCGAGCUGCGCCAAGCAA	→ 5'	GGCAGTCCCGTCCGCCATAG	TGCAAACTTCAAATGAACCT	5	0	4.8	0		22.3833
			GRMZM2G441583	UUCCCGAGCUGCACCAAGCCC	5'UTR	TTCAGGTCCGTCTAGACCAG	CAGATGTCCAACATCAAGCC	5	2.75	328.25	0.00837776		0.327312
miR169	miR169cr miR169fh	GGCCGUUCAGUAGGAACCGAC AUCCGUUCAGUAGGAACCGAU	GRMZM2G000686	CUGGCAACUCAUCCUUGGCUU	→ 5'	GTGAGTAGGGAGCCCCGACA	ATCAGCGATTCGACTCGGCT	3.5	30.9667	27.6	1.12	16.65	0.6
			GRMZM2G037630	GUGGCAAUUCAUCCUUGGCUU	→ 5'	TGGCGCGCTCCGGTGTGCCC	ATGATGTATCTTATAGTAAT	3.5	3.35	13.15	0.25		1.27
			GRMZM2G038303	GUGGCAACUCAUCCUUGGCUU	→ 5'	TTCCCAGGCGCGCACTGCCT	TTGAAACTATGGATATGCAA	3.5	0.866667	1.25	0.69		13.32
			GRMZM2G040349	GUGGCAACUCAUCCUUGGCUC	→ 5'	CATTCCCAGGCACACTGCCT	TTGGAACTTTGAATATGCAA	3.5	19.5	34.65	0.56		0.48
			GRMZM2G091964	CAGGCAAUUCAUUCUUGGCUU	→ 5'	ATGGGGTAGGTACGCTGTTT	TCACGTTCCACCCTTGTGTA	4	158.783	7.45	21.31		2.23
			GRMZM2G165488	UAGGCAAAUCAUUCUUGGCUG	→ 5'	CCCCGATGGCTGGTTGTCTG	TTCTGCATTGGGGTGCGACC	3	64.8	18.85	3.44		0.88
			GRMZM5G829103	UAGGCAAAUCAUUCUUGGCUG	→ 5'	CGCCGATGGCTGGTCGTCTG	TTCCGCATTGGGGTGCAACC	3	67.8167	6.9	9.83		2.41
			GRMZM5G853836	UAGGCAAAUCAUUCUUGGCUG	→ 5'	TCCCTCCGTTTGGCTCCCGG	AAGGCAACGTGAGCGTTCCA	3	81.7833	19.45	4.2		0.86
			GRMZM5G857944	CAGGCAAUUCAUCCUUGGCUU	→ 5'	GCTGTGGTGTCTTAGTCTCT	AATTTCTGGCTTTTTATTAG	3	0.85	1.6	0.53		10.41
miR171	miR171deij	CUAUAACCGUGCCGAGUUAGU	GRMZM2G037792	GAUAUUGGCGCGGCUCAAUCA	→ 3'	AACTCCATCGGCGGGCGCGA	GCAGCTTCCCCCTATCGGGA	0	32.15	42.75	0.75	33.36	0.78
			GRMZM2G051785	GAUAUUGGCGCGGCUCAAUCA	→ 5'	GACTCCACTGGCGCGCGCGA	CCGGCTCCCCTCACCGCCGG	0	0.6	9.1	0.07		3.67
			GRMZM2G079470	GAUAUUGGCGCGGCUCAAUUA	→ 5'	GACGCCTTCGGCGCCCGCGA	TCGGCTCCCCGCCGTGCCCA	2	7.51667	19.45	0.39		1.72
			GRMZM2G098800	GAUAUUGGCGCGGCUCAAUCA	→ 5'	AATTCCATTGGCGCGCGAGA	CCAGCTTCCCTTGCTCGGGA	0	12.4833	26.6	0.47		1.25
			GRMZM2G110579	GAUAUUGGCGCGGCUCAAUCA	→ 5'	AATTCCATTGGCGCGCGAGC	CCAGCTTCCCCCGCTCGGGA	0	12.4667	17.8	0.7		1.87
			GRMZM5G825321	GAUAUUGGCGCGGCUCAAUCA	→ 5'	AACTCCATCGGCGCGCGAGA	GCAGCTTCCCCCAATCGGGA	0	32.15	29.9	1.08		1.12
miR172	miR172abcd miR172e	UACGUCGUAGUAGUUCUAAGA UACGUCGUAGUAGUUCUAAGG	GRMZM2G076602	CUGCAGCAUCAUCACGAUUCC	→ 5'	GGCCGCCGCCGCGACCGCAG	ATCCCTACGTTGTTACGAGT	3	10.8667	5.4	2.01	24.74	4.58
			GRMZM2G160730	CUGCAGCAUCAUCAGGAUUCC	→ 3'	CGACGCCAGCAGCGCCGCCG	CACTGTGGCAGCTGGGTGCG	2	4.31667	7.25	0.6		3.41
			GRMZM2G174784	CUGCAGCAUCAUCACGAUUCC	→ 5'	GAGCACCGCCGCGACCGCAG	CTCCCTACGTTGTTACTACG	3	5.45	47.25	0.12		0.52
			GRMZM2G176175	CUGCAGCAUCAUCAGGAUUCU	→ 5'	CCCAGTTCTCCCTGCCACCA	CTACCGCCGCTGCCACCGGC	1	36.9333	2.8	13.19		8.84
			GRMZM2G700665	CUGCAGCAUCAUCAGGAUUCU	→ 3'	TGCCGCCCTGCCGTCGTCCG	CCAACACCGCCACGACAGCT	1	3.4	3.2	1.06		7.73
			GRMZM5G862109	CUGCAGCAUCAUCAGGAUUCU	→ 5'	TCACGTGCCGTTGCACCACT	CTACCGCCGCCGGGGCCAAC	1	37.6333	30.95	1.22		0.8
			GRMZM5G879527	GUGUGGCAUCAUCAAGUAUUCA	→ 3'	CTGGACTGCTGGATCGAGCA	AAGCGACTGGGAGGAAGGAA	4	3.93333	21.4	0.18		1.16
miR319	miR319abcd	UCCCUCGUGGGAAGUCAGGUU	GRMZM2G015037	AGGGGACCCCUUCAGUCCAG	→ 5'	AGAGCCAGTTCTTCTTCCAG	TAACCAGCCCTCCGACTCCG	4	4.85	1.9	2.55263	25.2	13.2632
			GRMZM2G020805	AGGGGGGCCCUUCAGUCCAA	→ 5'	GTCTTATGGGTGTCAACACT	TTCGCAGCCGCATATCTCCG	4.5	3.56667	9.1	0.391941		2.76923
			GRMZM2G028054	UGGAGCCCCCUUCAGUCCAA	→ 5'	CACAAATGGTCCTTCGAAGA	AATAGCAGGCTCAAGTATAC	3	3.03	5.4	0.561728		4.66667
			GRMZM2G089361	AGGGGGACCCUUCAGUCCAA	→ 3'	CAGGTTTCTTGGGTGCCAGT	TTCGCAGTCGAACTTCTCGG	4.5	19.2333	1.3	14.7949		19.3846
			GRMZM2G115516	AGGGGGACCCUUCAGUCCAA	→ 5'	CGGGTTTCTTGGGTGCCAAT	TTCGCAGTCGAACTTCTCAG	4.5	19.2333	1.7	11.3137		14.8235
miR390	miR390ab	CCGCGAUAGGGAGGACUCGAA	GRMZM2G020468	UGU-CUAUCCCUUCUGAGCUG	→ 5'	CTGTTCTTACTTCTGTTCTA	GTGTTGAGCTACTTTGATAA	4.5	0	558.7	0	1.95	0.00349025
			GRMZM2G084821	UCUCUUCCUCGUCCUGAGCUU	3'UTR	TGCTCTACTTTCTTGCGGTC	GACAGGCTACTTTCTACTAG	4	10.5	102.4	0.102539		0.019043
			GRMZM2G124744	AUU-CUAUCCCUCCUGAGCUA	→ 5'	GTCTACCTACTTTCTGCTCC	GTTGTTGATCCCATGTAATA	4.5	5.06667	182.95	0.0276943		0.0106586
			GRMZM2G155490	CCCUCUAUCCCUCCUGAGCUA	3'UTR	TTCGCCGCTCCTCTCTCGCC	TGGTCGTCTCTCTTATGTAC	4	0	16.7	0		0.116766
			GRMZM2G178686	CCUUCUAUCCCUCCUGAGCUA	→ 3'	CATCCACCTACTTTCTGTTC	ATTGTTGCTCCTATGTAATC	4.5	0.983333	139.35	0.00705657		0.0139935
			GRMZM2G512113	CGU-CUAUCCCUCUUGAGCUU	3'UTR	CCTCCCATCTTCTTCGTCTC	GTACCGCTTTGCAGTTATAG	4	3.71667	263.35	0.014113		0.00740459
			GRMZM2G588623	CGA-CUAUCCCUUCUGAGCUU	→ 5'	GATAGGCTCATCTCCTGTAT	GTAAATTTCGTTTTAGCATT	4	0	0.05	0		39
			GRMZM5G806469	CCGUCUAUCCCUCUUGAGCUU	→ 3' & 3'UTR	TTCTCGTATCTCTCCCGTCC	AATTGGCACGCTGCCAGTAG	4	0.883333	158.75	0.0055643		0.0122835
miR393	miR393abc	CUAGUUACGCUAGGGAAACCU	GRMZM2G135978	GA-CAAUGCGAUCCCUUUGGA	→ 5'	GCAAACGCTGCCAAGCTGGA	TGTCGACGTGCTCAATGACC	1	40.4167	110.2	0.366757	3.68	0.0333938
			GRMZM2G137451	ACACAAUGCGAUCCCUUUGGA	→ 3'	GGGAAATGTTGCCAAATATG	TGTCATCATGCAATGTCACA	3	0	119.6	0		0.0307692
			GRMZM5G848945	GA-CAAUGCGAUCCCUUUGGA	→ 3'	AAGATGACTCTCCTCTGGAA	ATATCTGGTGCTTAGAGTTC	1	2.61667	220.05	0.0118912		0.0167235
miR394	miR394ab	CCUCCACCUGUCUUACGGUU	GRMZM2G064954	GGAGGUGGACAGAAUGCCAA	→ 5'	AAGATGACTCTCCTCTGGAA	ATATCTGGTGCTTAGAGTTC	0	2.55	19.7	0.13	218.34	11.08
			GRMZM2G119650	GGAGGUGGACAGAAUGCCAA	→ 5'	AAGATGACTCTCCTCTGGAA	ATCTCTGGTGCTTAGAGTTC	0	1.88333	20.15	0.09		10.84
miR396	miR396abg miR396ef	GUCAAGUUCUUUCG-ACACCUU UUCAAGUUCUUUCG-ACACCUU	GRMZM2G018414	CCGUUCAAGAAAGCCUGUGGAA	→ 5'	CACATCAATAGGAACCGCCA	AACCAACCTAGAAAGGCCAC	3	11.05	264.5	0.0417769	3.87	0.0146314
			GRMZM2G033612	CCGUUCAAGAAAGCCUGUGGAA	5'UTR	CACATCAACAGAAACCGTCA	AATCAACCTAAGAAGACCAC	3	3.58333	86.1	0.0416183		0.0449477
			GRMZM2G034876	CCGUUCAAGAAAGCCUGUGGAA	→ 5'	CACATGCACCGCGGCCGCAA	ACGCAGCTCGCGCCCCAGTC	3	60.8167	470.2	0.129342		0.00823054
			GRMZM2G041223	CCGUUCAAGAAAGCCUGUGGAA	→ 5'	CACATGCACCGCGGCCGCAA	GCGCAGCTCGTGCCCCCGCC	3	311.917	231.2	1.34912		0.0167388
			GRMZM2G045977	CCGUUCAAGAAAGCCUGUGGAA	→ 3'	CACGTCCACCGCGGCCGCGG	GCCGCCGCCCCGGCGCCCAG	1	0	78.15	0		0.0495202
			GRMZM2G067743	CCGUUCAAGAAAGCCUGUGGAA	5'UTR	CACATCCACCGCGGGAAGAG	GTGACCTCCCCCGCCGCCTA	1	0	253.65	0		0.0152572
			GRMZM2G098594	CCGUUCAAGAAAGCCUGUGGAA	→ 5'	CACATGCACCGTGGCCGCAA	TCCAAGACCGCCTCGTCGTC	3	156.9	183.85	0.853413		0.0210498
			GRMZM2G099862	CCGUUCAAGAAAGCAUGUGGAA	→ 5'	CACATAAAACGTGGTTGCCA	GGCCGAAAGGCAACACCGAC	3	3.7	1173.5	0.00315296		0.00329783
			GRMZM2G105335	CCGUUCAAGAAAGCCUGUGGAA	→ 5'	CACATGCACCGGGGCAAGAA	ATGTCCTTGGCCACGCCGGC	3	6.23333	324.1	0.0192327		0.0119408
			GRMZM2G119359	CCGUUCAAGAAAGCCUGUGGAA	5'UTR	CACATGCACCGTGGCCGCAA	TCCAAGACCGCCTCCTCGCC	3	156.9	757.25	0.207197		0.0051106
			GRMZM2G124566	CCGUUCAAGAAAGCCUGUGGAA	→ 3'	CACGTCCACCGCGGCCGCGG	GCCGCCGCGGCACCGGCGGC	3	9.68333	160	0.0605208		0.0241875
			GRMZM2G129147	CCGUUCAAGAAAGCCUGUGGAA	→ 5'	CACATGCACCGCGGCCGCAA	GCGCAGCTCGCGCCCCCGCC	3	311.183	555.4	0.560287		0.00696795
			GRMZM2G178261	UCGUUCAAGAAAGCAUGUGGAA	→ 5'	CACATGAACCGGGGACGCCA	GGCCAGCCTGGCCATGCCGC	3.5	18.9167	1184.65	0.0159681		0.00326679
			GRMZM5G850129	CCGUUCAAGAAAGCCUGUGGAA	→ 5'	CACATTCACCGCGGGAAGAG	GTGACCTCCTCCCCCGCCGC	1	0	110.95	0		0.0348806
			GRMZM5G853392	UCGUUCAAGAAAGCAUGUGGAA	5'UTR	CACATGAACCGGGGACGCCA	GACCAGCCTGGCCATGCCGC	3.5	1.05	174.05	0.00603275		0.022235

## Sheet: Dataset 5
Supplemtal Dataset 5: Sequencing metrics
smallRNA - whole shoot apex
Sample	Raw_reads	Trimmed_reads (18-26bp)	Percentage	Mapped_reads	Percentage	Mapped_reads(<=20)	Percentage
B73_ShootApical	205391907	187812641	0.914411	169729052	0.9037	102985786	0.5483
RNAseq - adaxial and abaxial leaf tissues
Sample	Raw_reads	Trimmed_reads	Percentage	Mapped_reads	Percentage	Uniquely_mapped	Percentage
Abaxial_rep1	28519674	27905334	0.978459	25241971	0.904557	24048623	0.861793
Abaxial_rep2	29826799	29533783	0.990176	27089129	0.917225	25840684	0.874953
Adaxial_rep1	31076173	30641547	0.986014	28024517	0.914592	26881660	0.877294
Adaxial_rep2	18560466	18343670	0.988319	16803496	0.916038	16091513	0.877224
RNAseq - P3 leaf primordia
Sample	Raw_reads	Trimmed_reads	Percentage	Mapped_reads	Percentage	Uniquely_mapped	Percentage
dcl1-2_rep1_R1	12522477	12430937	0.99269	7411680	0.596229	6890122	0.554272
dcl1-2_rep1_R2	12522477	10278902	0.820836	5793355	0.563616	5402527	0.525594
dc1-2_rep2_R1	14449998	14340787	0.992442	8293573	0.578321	7687574	0.536064
dc1-2_rep2_R2	14449998	11827721	0.818528	6448340	0.545189	5998666	0.50717
wt_rep1_R1	13167518	13072770	0.992804	7922820	0.606055	7417195	0.567377
wt_rep1_R2	13167518	10769914	0.817915	6176631	0.573508	5801384	0.538666
wt_rep2_R1	12531941	12428878	0.991776	6916345	0.556474	6393986	0.514446
wt_rep2_R2	12531941	10429630	0.832244	5473006	0.524756	5076450	0.486733
RNAseq - meristematic central zone
Sample	Raw_reads	Trimmed_reads	Percentage	Mapped_reads	Percentage	Uniquely_mapped	Percentage
dcl1-2_rep1	30499175	30349032	0.995077	25901271	0.853	24425906	0.804833
dcl1-2_rep2	30999132	30843771	0.994988	26449003	0.858	24866690	0.806214
wildtype_rep1	37956568	37765919	0.994977	31562970	0.836	29847685	0.790334
wildtype_rep2	32532362	32370023	0.99501	27675739	0.855	26147587	0.807772
